# Supplementary material for: Controlled Anchoring of (Phenylureido)sulfonamide-Based Receptor Moieties: An Impact of Binding Site Multiplication on Complexation Properties
Source: MDPI journal article supplement (doi:10.3390/molecules26185670), 2021-09-18
Supplement: s1 [file s1]

## Supporting information

# Controlled Anchoring of (Phenylureido)sulfonamide-Based Receptor Moieties: An Impact of Binding Site Multiplication on Complexation Properties

Karolína Salvadori <sup>1,2</sup>, Alena Krupková <sup>1</sup>, Lucie Červenková Šťastná <sup>1</sup>, Monika Müllerová <sup>1</sup>, Václav Eigner <sup>2</sup>, Tomáš Strašák <sup>1</sup> and Petra Cuřínová <sup>1,\*</sup>

<sup>1</sup> Institute of Chemical Process Fundamentals of CAS, v.v.i., Rozvojová 135, 16502 Prague 6, Czech Republic; lottesalvadori@gmail.com (K.S.); krupkova@icpf.cas.cz (A.K.); stastna@icpf.cas.cz (L.Č.Š.); mullerovam@icpf.cas.cz (M.M.); strasak@icpf.cas.cz (T.S.)

<sup>2</sup> Department of Solid State chemistry, University of Chemistry and Technology Prague, Technická 5, 16828 Prague 6, Czech Republic; vaclav.eigner@vscht.cz

\* Correspondence: curinova@icpf.cas.cz

## Contents

|                                                                                  |    |
|----------------------------------------------------------------------------------|----|
| Spectral characterization of building blocks 7 and 9 and of receptors 10-14..... | 2  |
| UV and <sup>1</sup> H NMR titration data .....                                   | 23 |
| X-Ray single crystal diffraction analysis.....                                   | 32 |

## Spectral characterization of building blocks 7 and 9 and of receptors 10-14.

**Figure S1.** Compound 7,  $^1\text{H}$  NMR (400 MHz, chloroform- $d$ ).

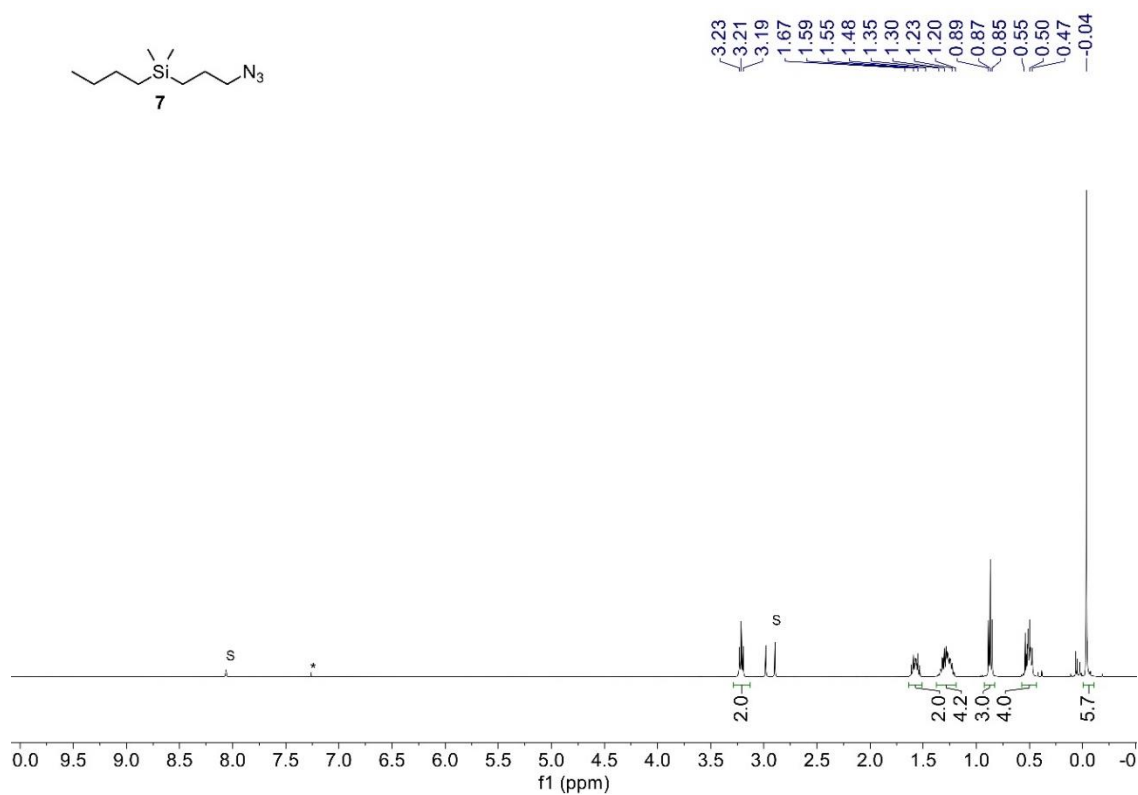

**Figure S2.** Compound 7,  $^{13}\text{C}$  { $^1\text{H}$ } NMR (100 MHz, chloroform- $d$ )

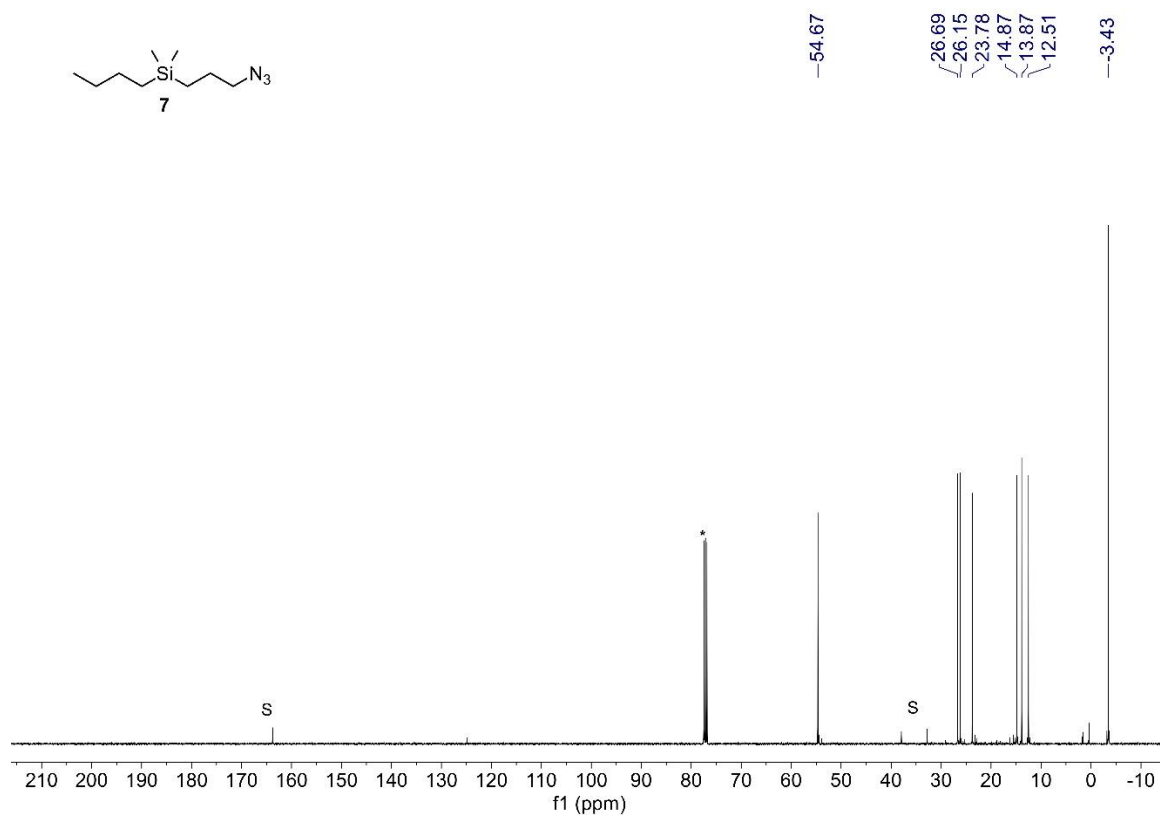

**Figure S3.** Compound **7**,  $^{29}\text{Si}$   $\{^1\text{H}\}$  NMR (79 MHz, chloroform- $d$ ).

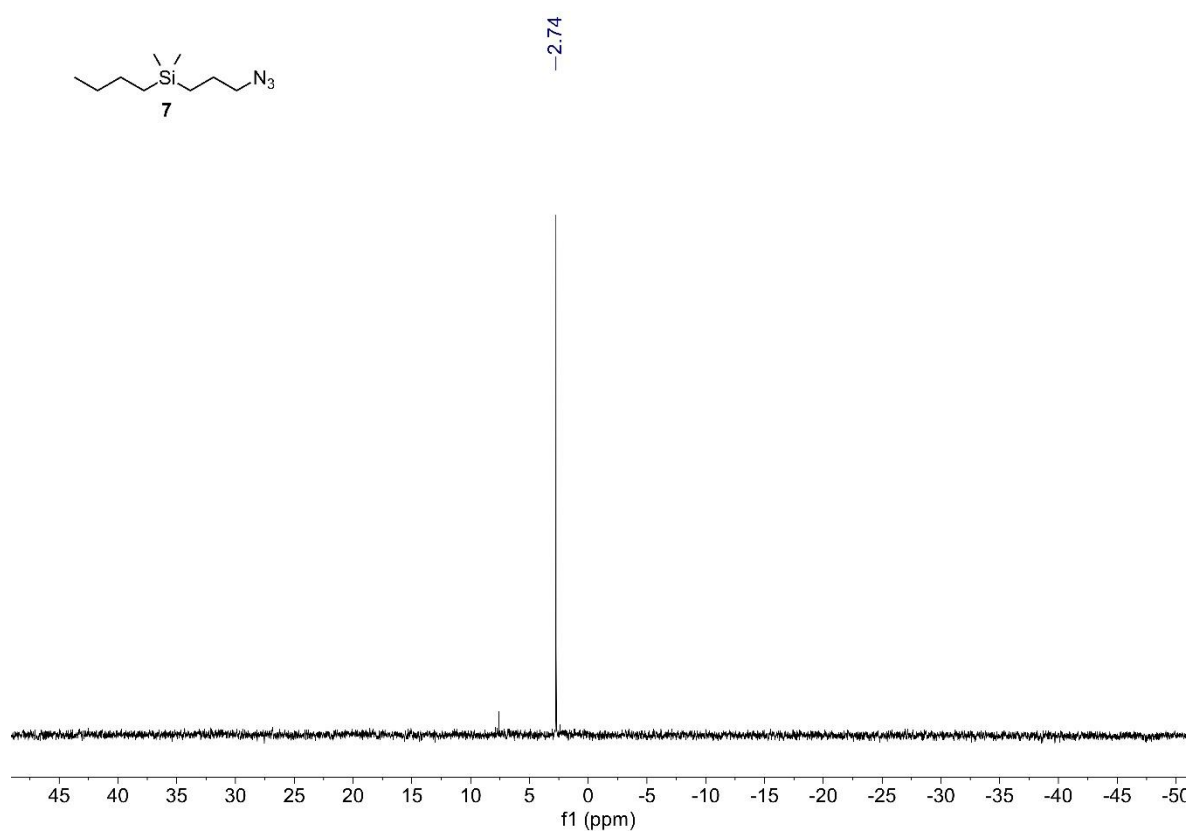

**Figure S4.** Compound **7**,  $^1\text{H}$ - $^1\text{H}$  COSY NMR, (400 MHz, chloroform- $d_6$ ).

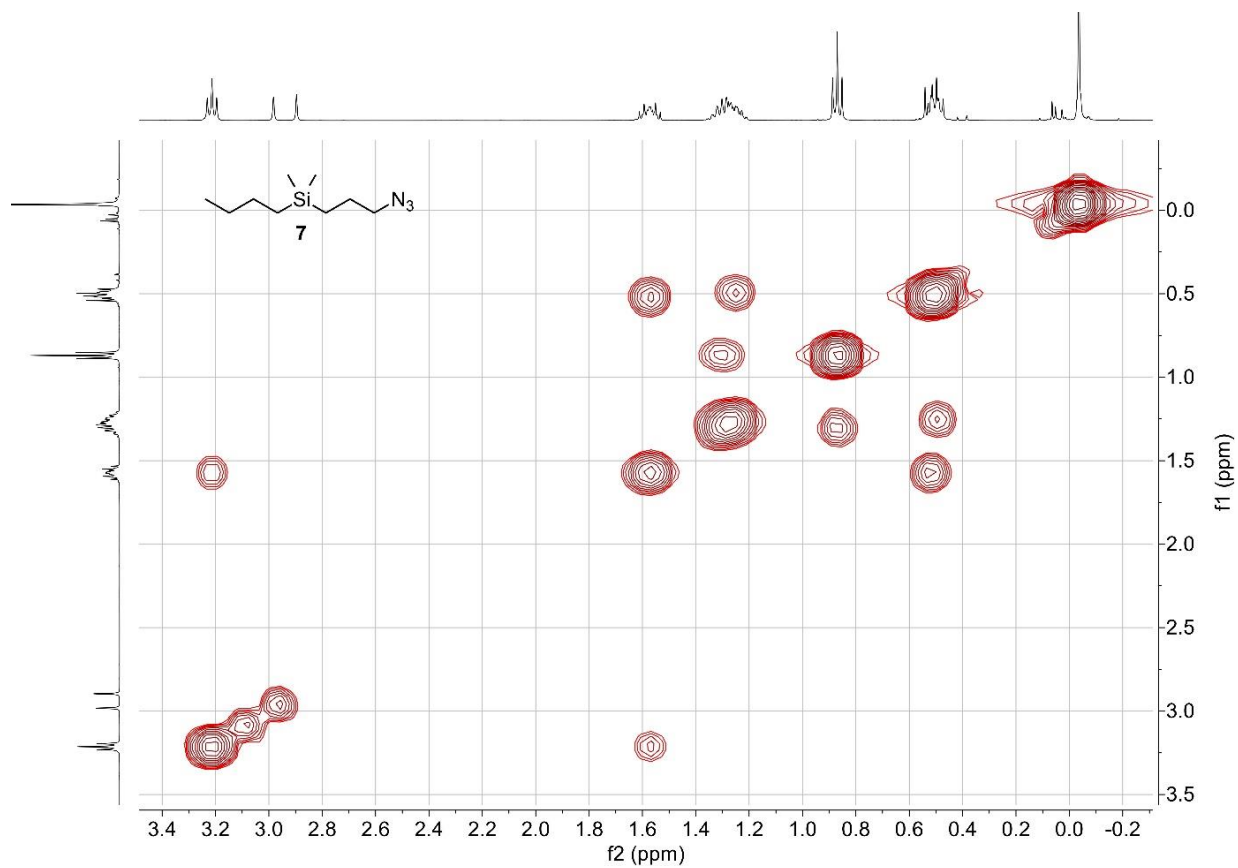

**Figure S5.** Compound **7**,  $^1\text{H}$ - $^{13}\text{C}$  HSQC NMR, (400/100MHz, chloroform-*d*).

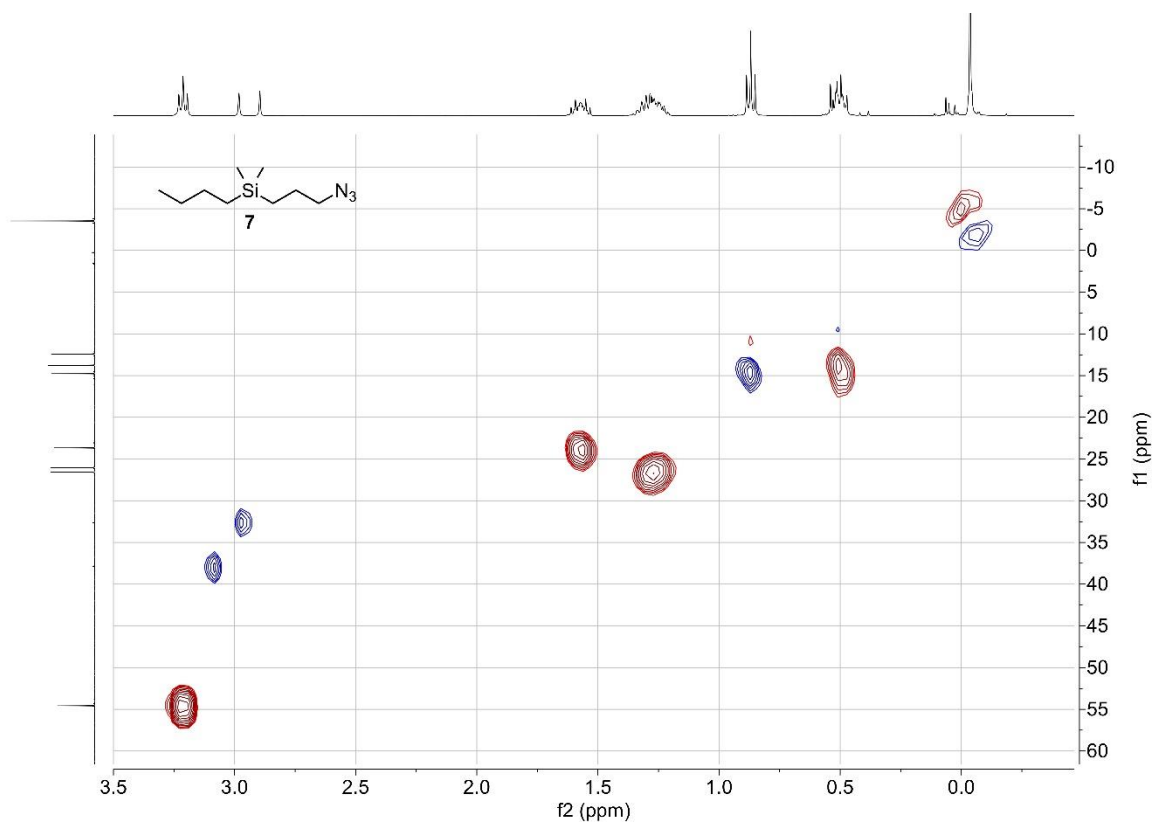

**Figure S6.** Mixture of compounds **9a**, **9b**,  $^1\text{H}$  NMR (400 MHz, chloroform-*d*).

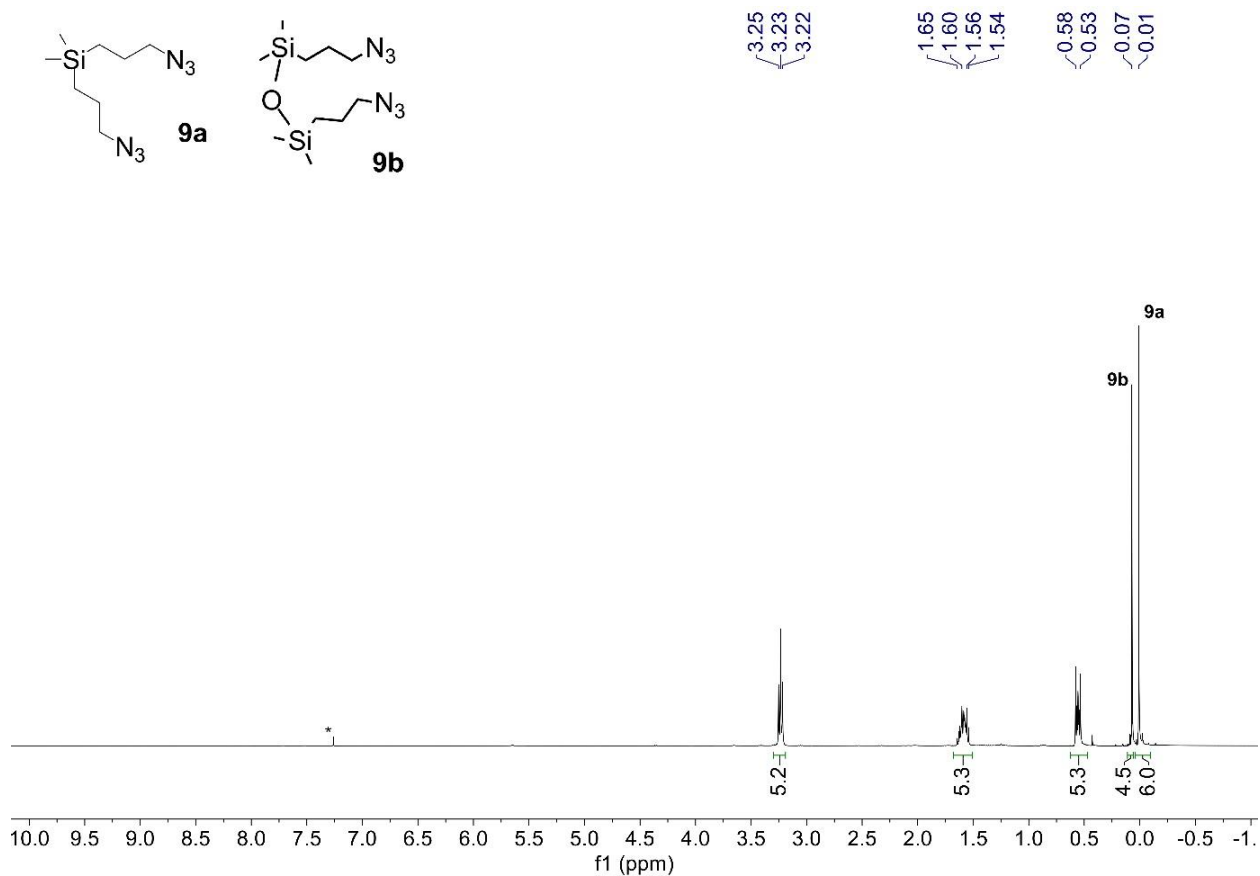

**Figure S7.** Mixture of compounds **9a**, **9b**,  $^{13}\text{C}$   $\{^1\text{H}\}$  NMR (100 MHz, chloroform-*d*).

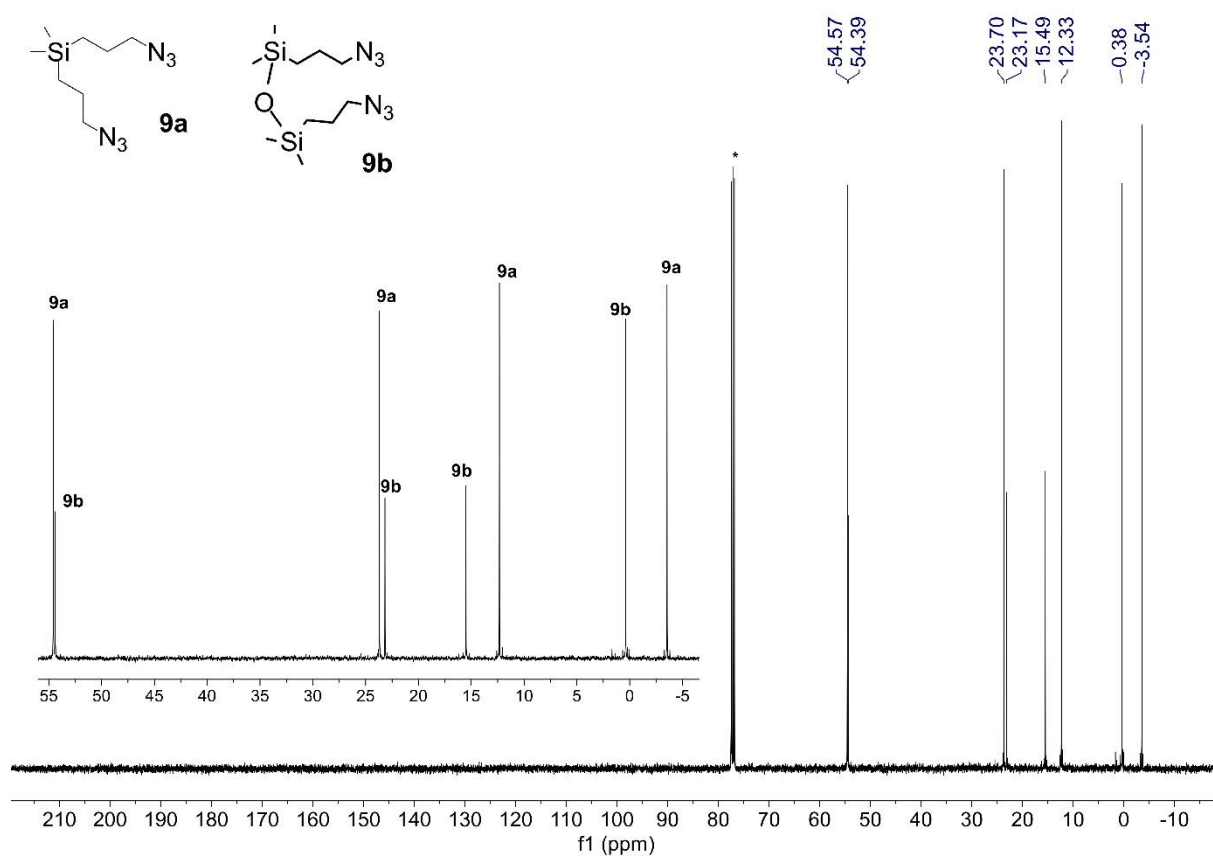

**Figure S8.** Mixture of compounds **9a**, **9b**,  $^{29}\text{Si}$   $\{^1\text{H}\}$  NMR (79 MHz, chloroform-*d*).

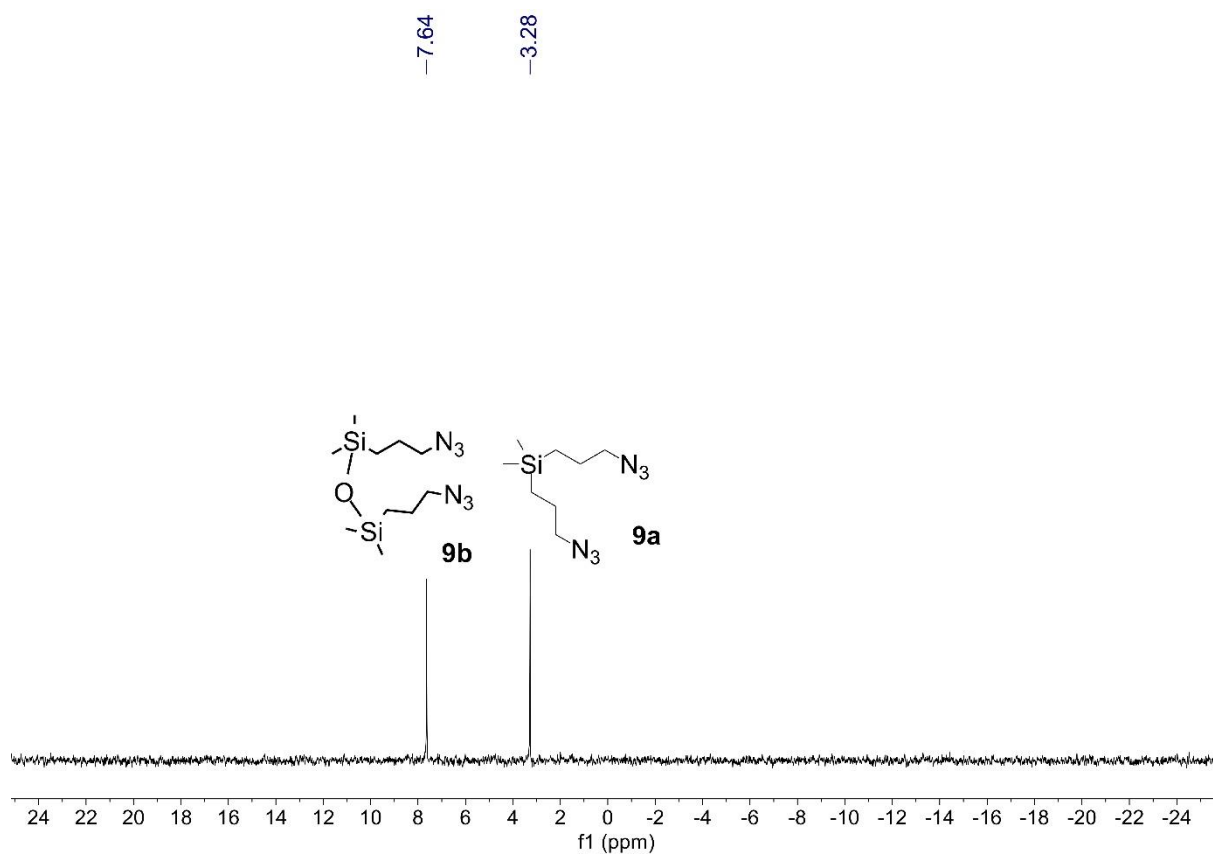

**Figure S9.** Mixture of compounds **9a**, **9b**,  $^1\text{H}$ - $^1\text{H}$  COSY NMR (400 MHz, chloroform-*d*).

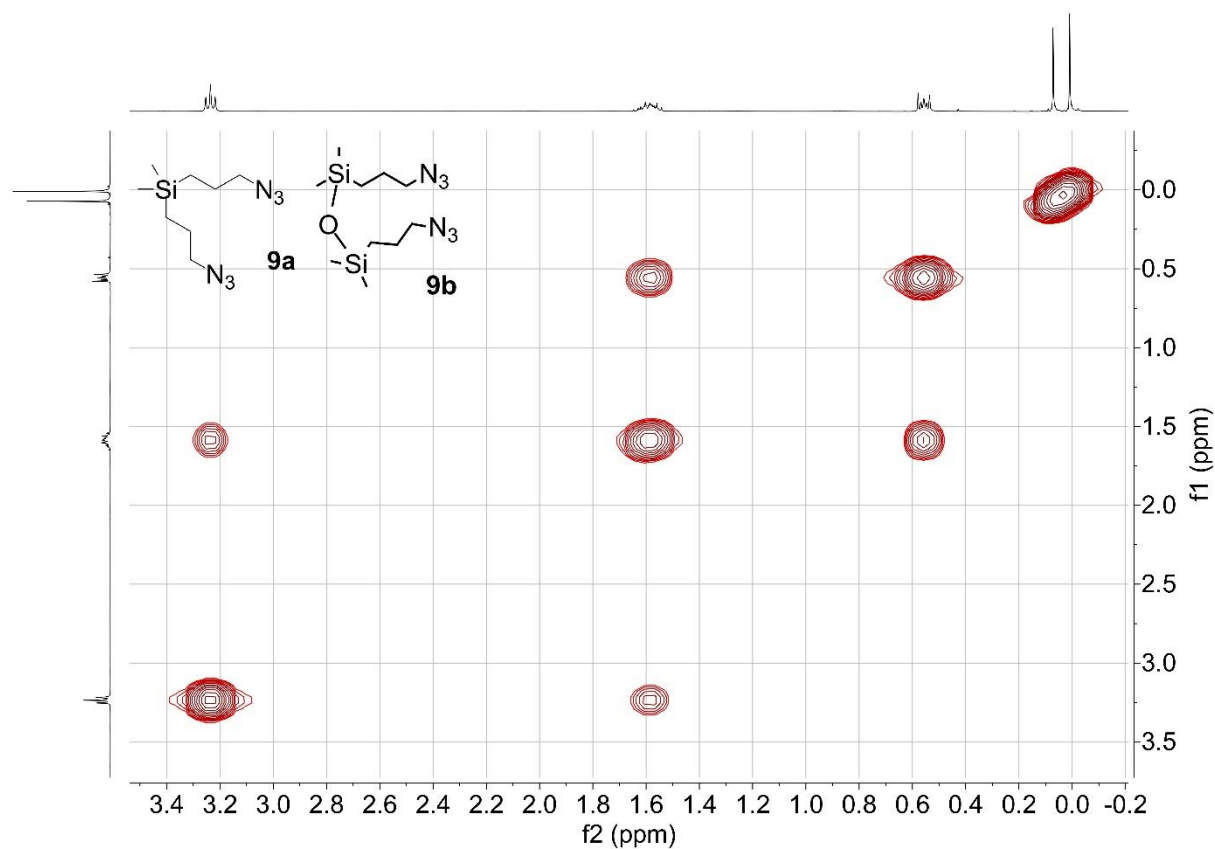

**Figure S10.** Mixture of compounds **9a**, **9b**,  $^1\text{H}$ - $^{13}\text{C}$  HSQC NMR (400/100 MHz chloroform-*d*).

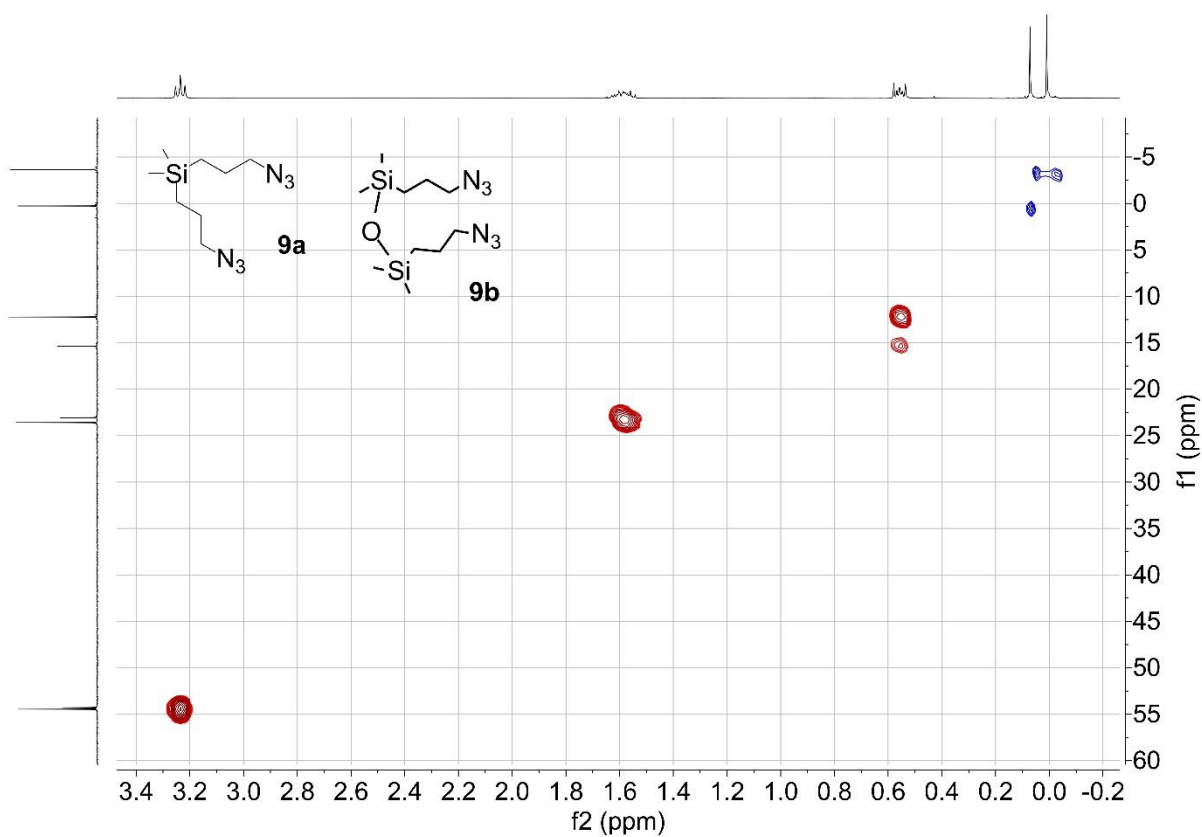

**Figure S11.** Compound **9b**,  $^1\text{H}$  NMR (400 MHz, chloroform-*d*).

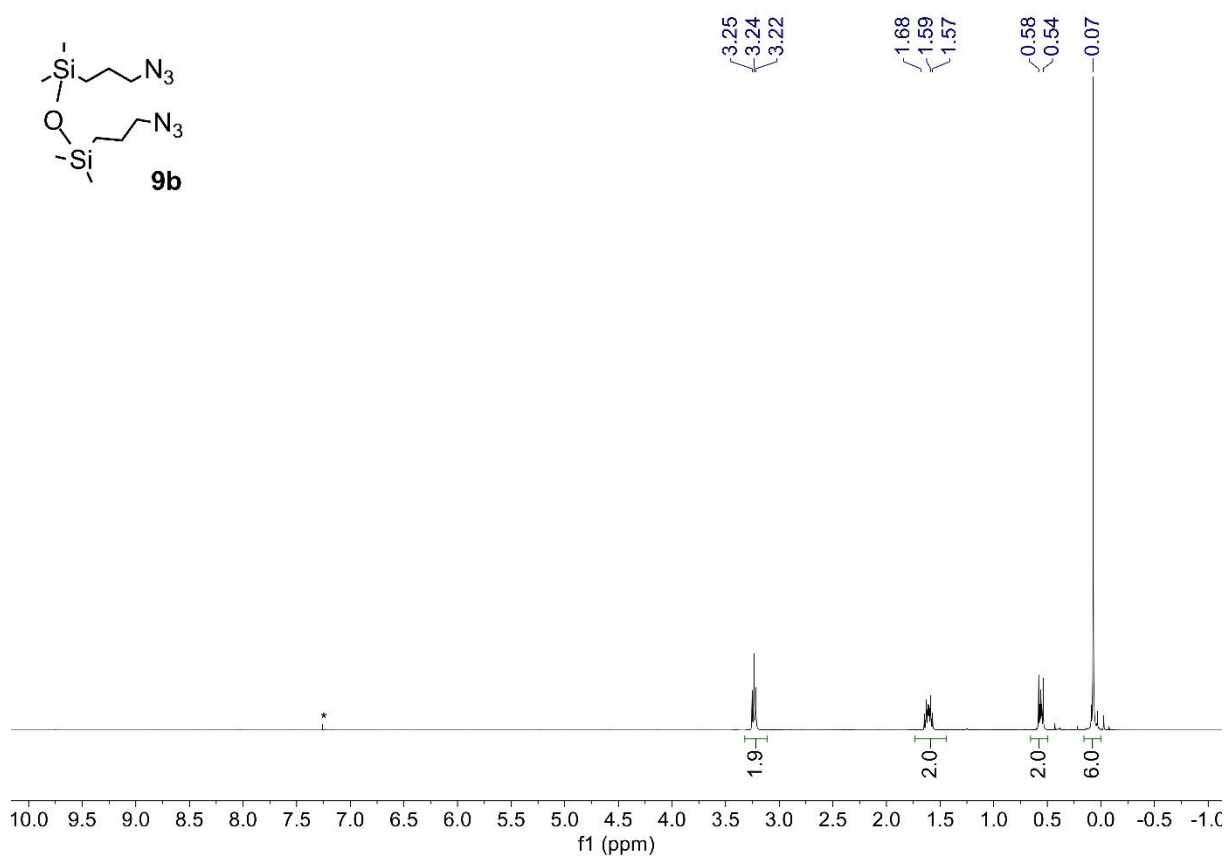

**Figure S12.** Compound **9b**,  $^{13}\text{C}$   $\{^1\text{H}\}$  NMR (100 MHz, chloroform-*d*).

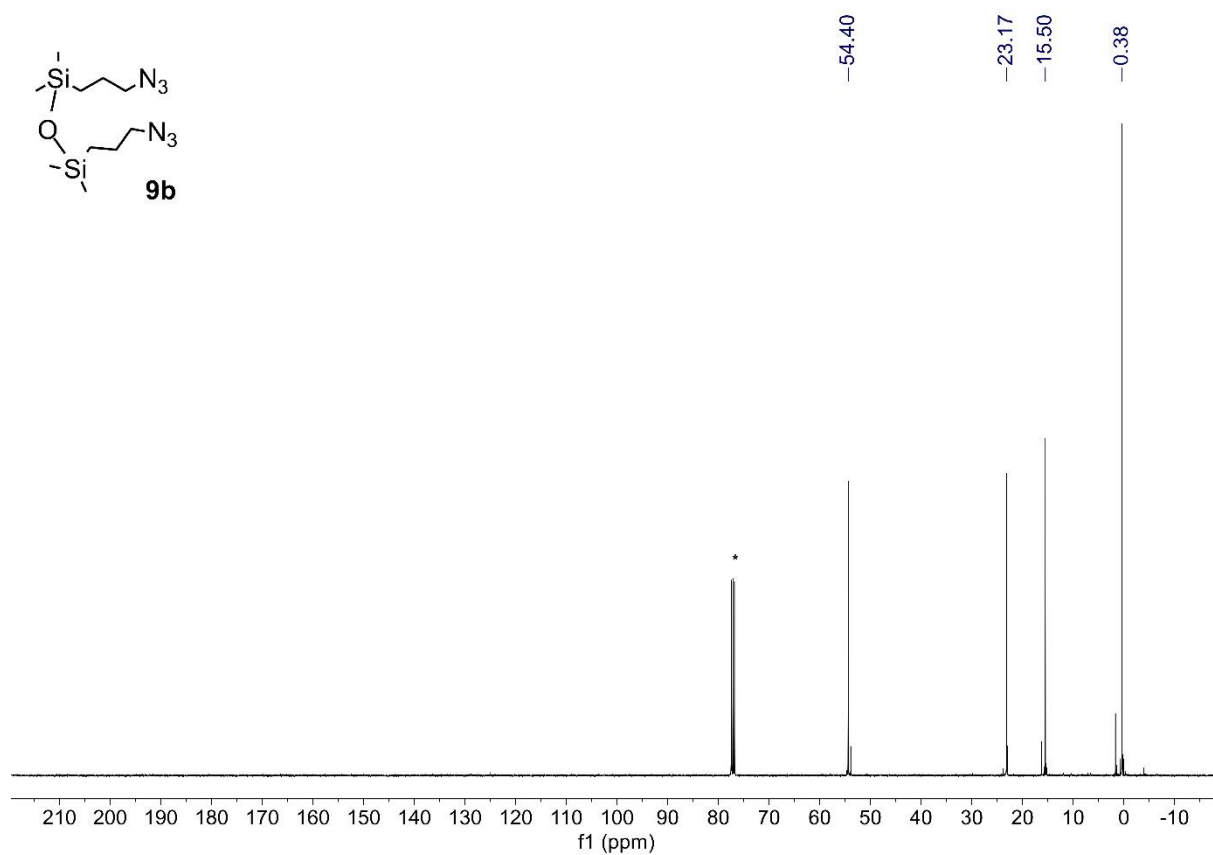

**Figure S13.** Compound **9b**,  $^{29}\text{Si}$   $\{^1\text{H}\}$  NMR (79 MHz, chloroform-*d*).

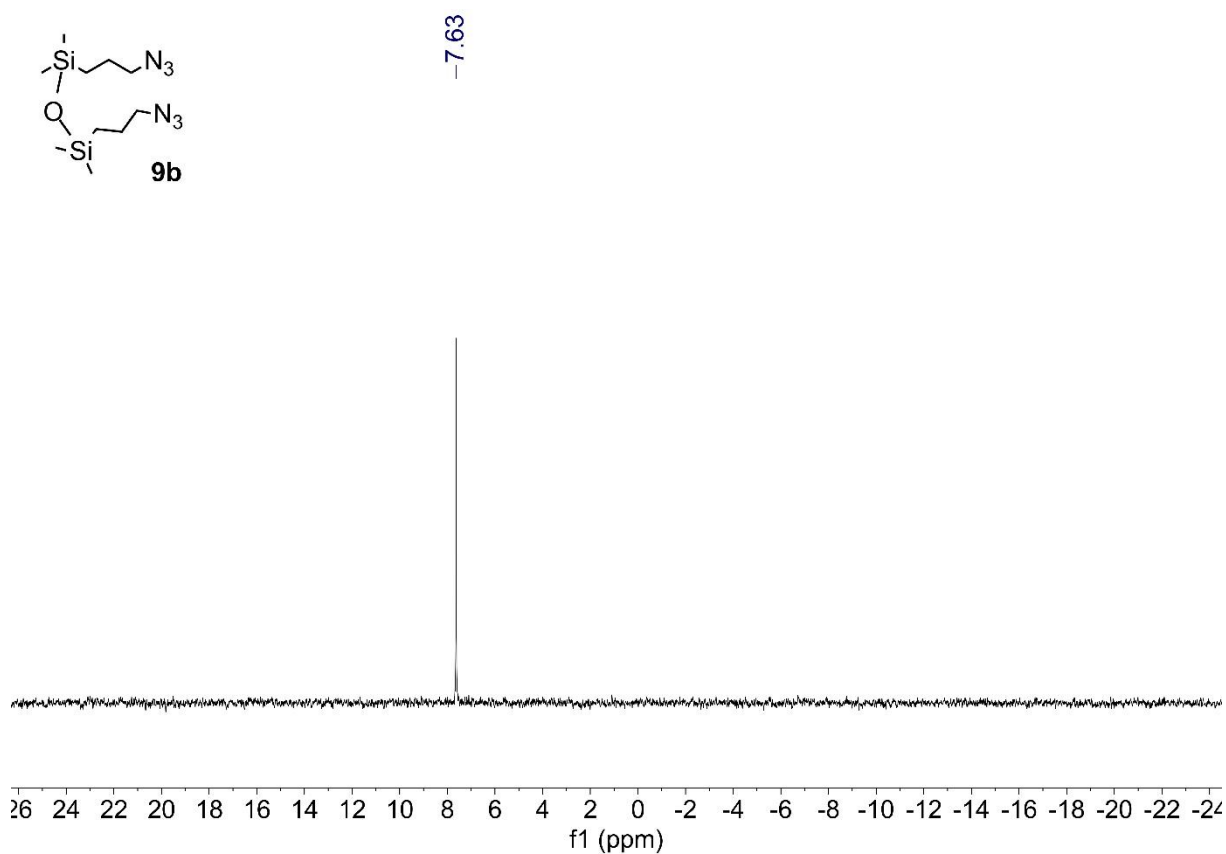

**Figure S14.** Compound **10**,  $^1\text{H}$  NMR (400 MHz, DMSO-*d*<sub>6</sub>).

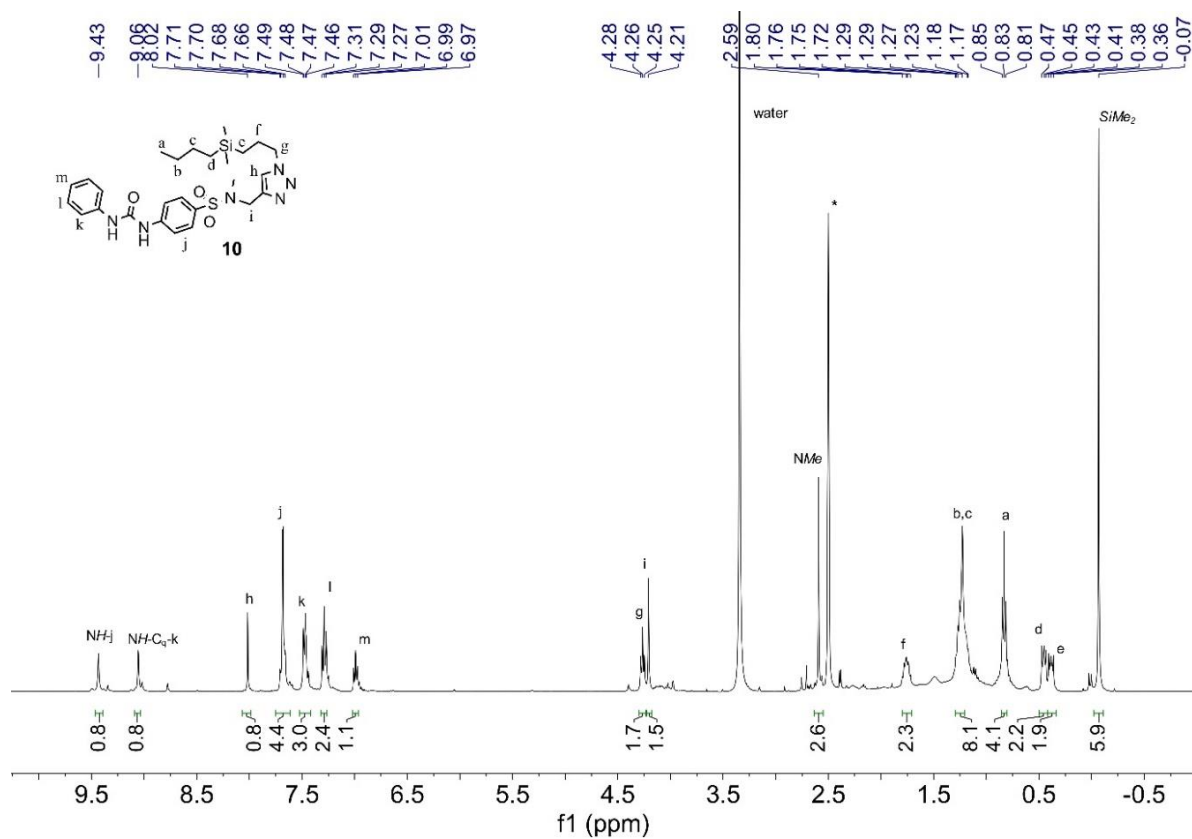



**Figure S15.** Compound **10**,  $^{13}\text{C}$  { $^1\text{H}$ } NMR (100 MHz, DMSO- $d_6$ ).

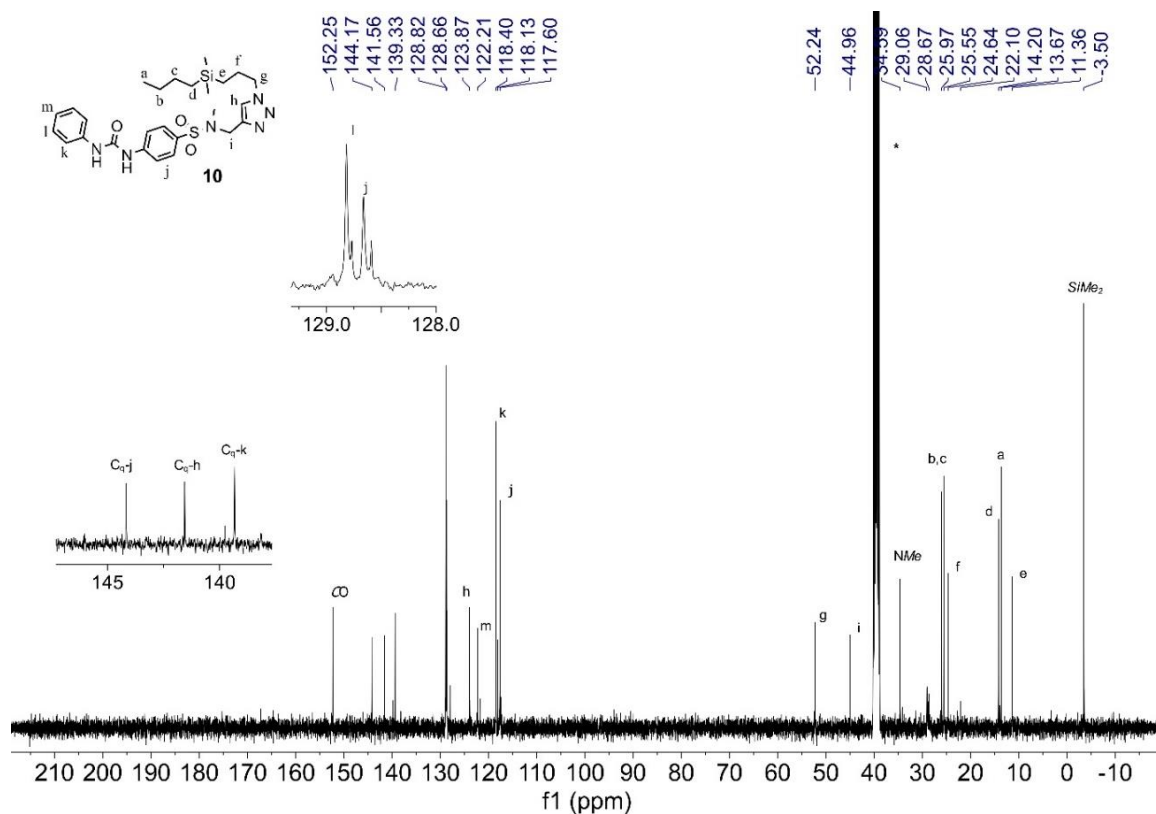

**Figure S16.** Compound **10**,  $^{29}\text{Si}$  { $^1\text{H}$ } NMR (79 MHz, DMSO- $d_6$ ).

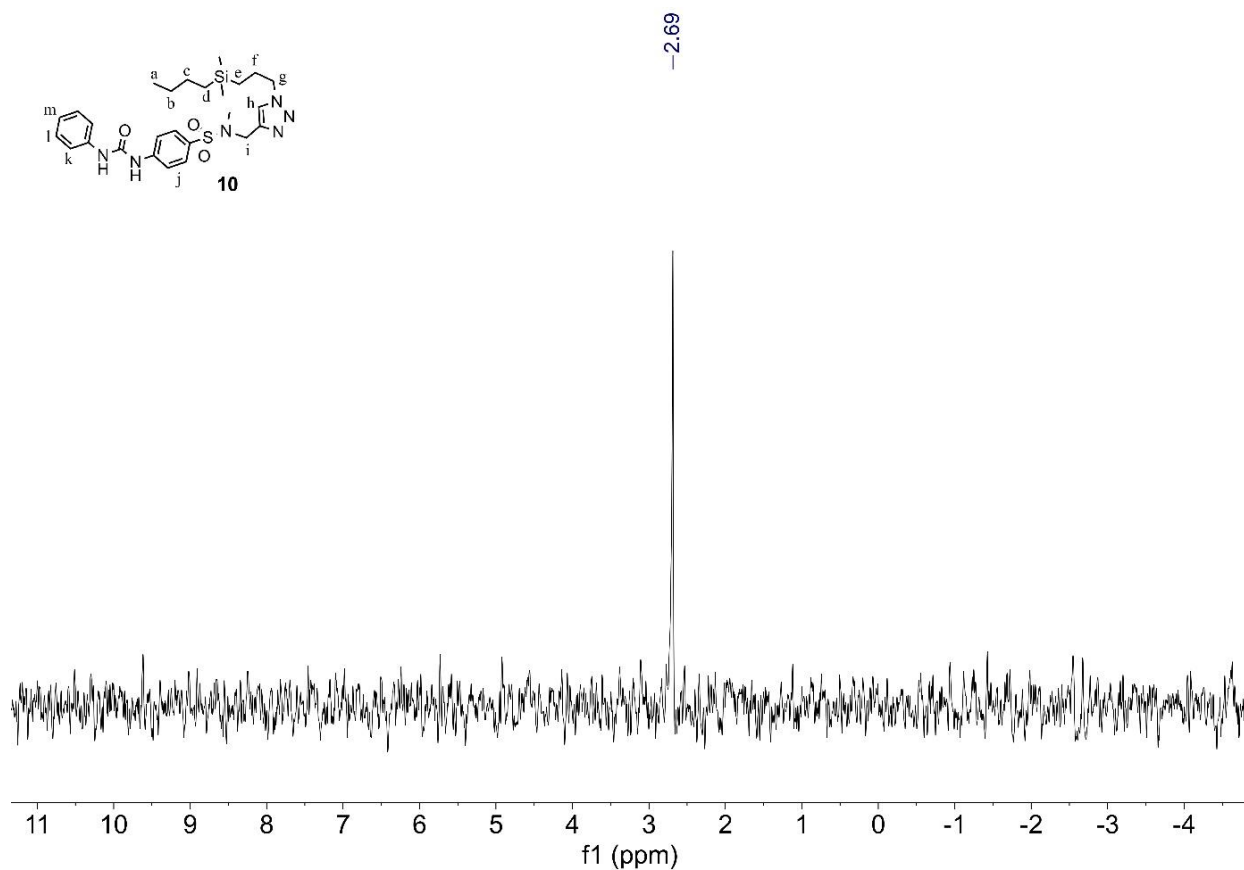

**Figure S17.** Compound **10**,  $^1\text{H}$ - $^1\text{H}$  COSY NMR, (400 MHz,  $\text{DMSO}-d_6$ ).

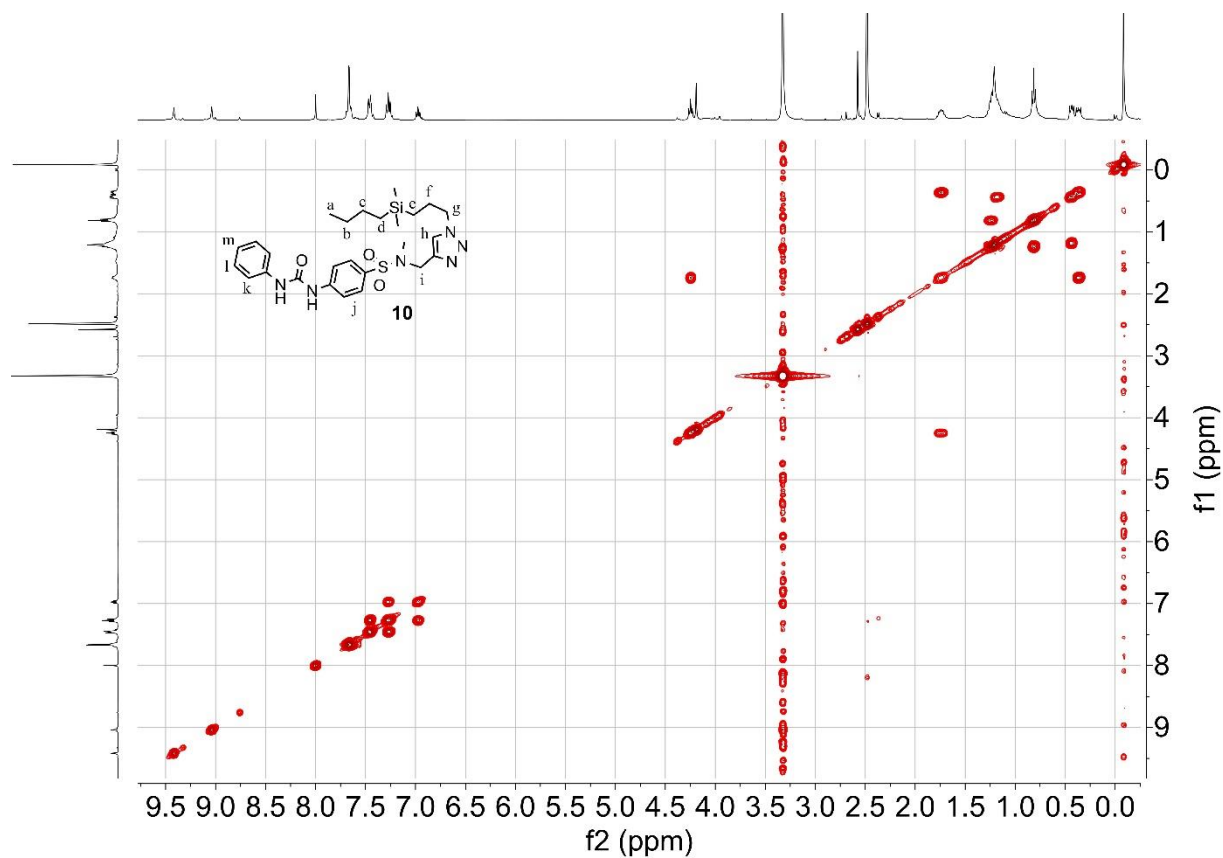

**Figure S18.** Compound **10**,  $^1\text{H}$ - $^{13}\text{C}$  HSQC NMR (400/100 MHz,  $\text{DMSO}-d_6$ ).

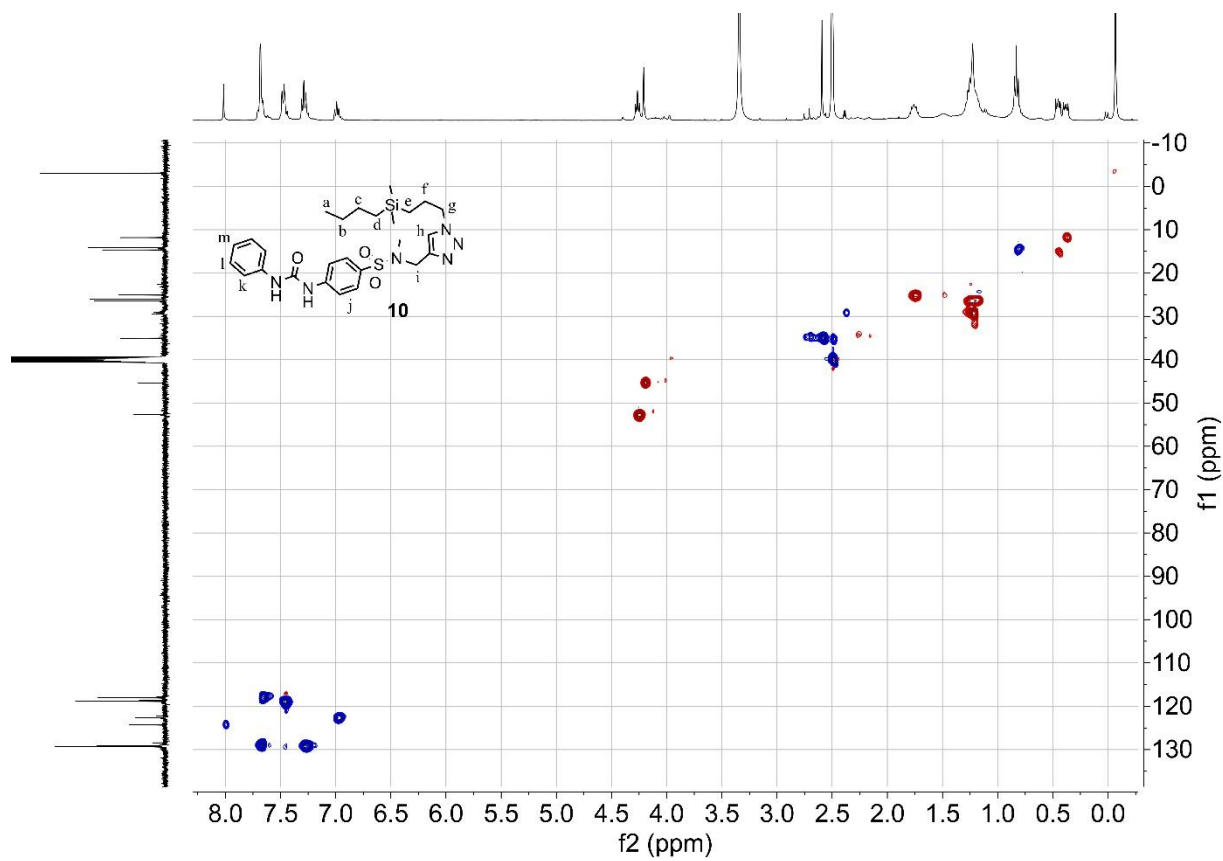

**Figure S19.** Compound **10**,  $^1\text{H}$ - $^{13}\text{C}$  HMBC NMR (400/100 MHz,  $\text{DMSO}-d_6$ ).

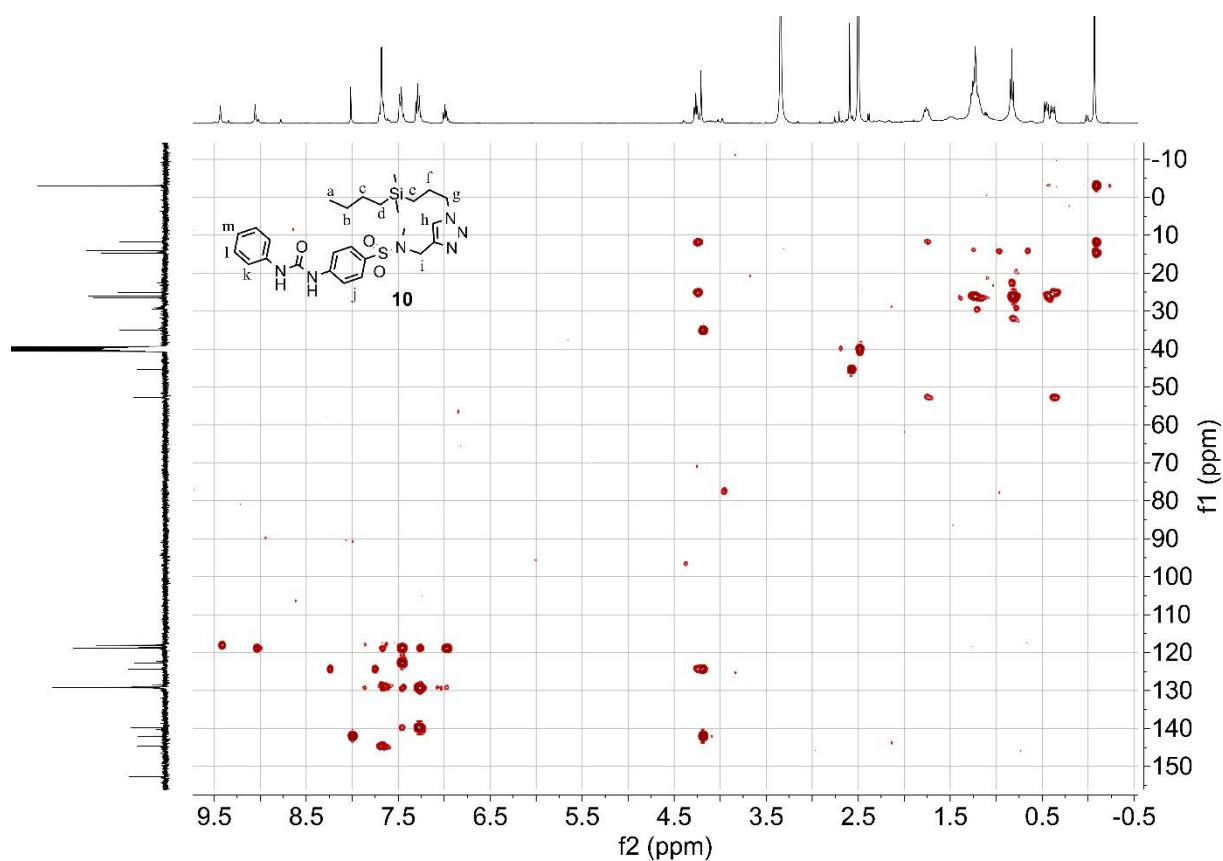

**Figure S20.** Compound **11**,  $^1\text{H}$  NMR (400 MHz,  $\text{DMSO}-d_6$ ).

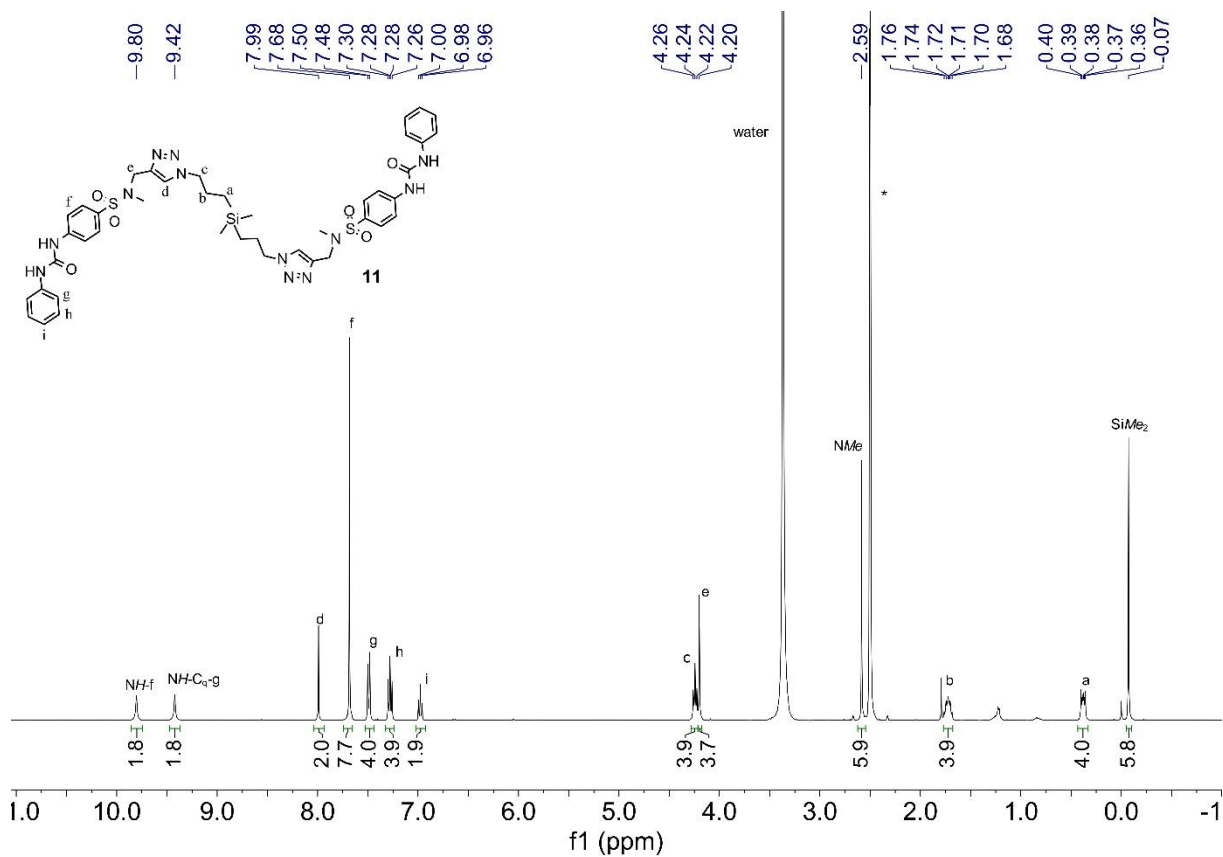

**Figure S21.** Compound **11**,  $^{13}\text{C}$  { $^1\text{H}$ } NMR (100 MHz, DMSO- $d_6$ ).

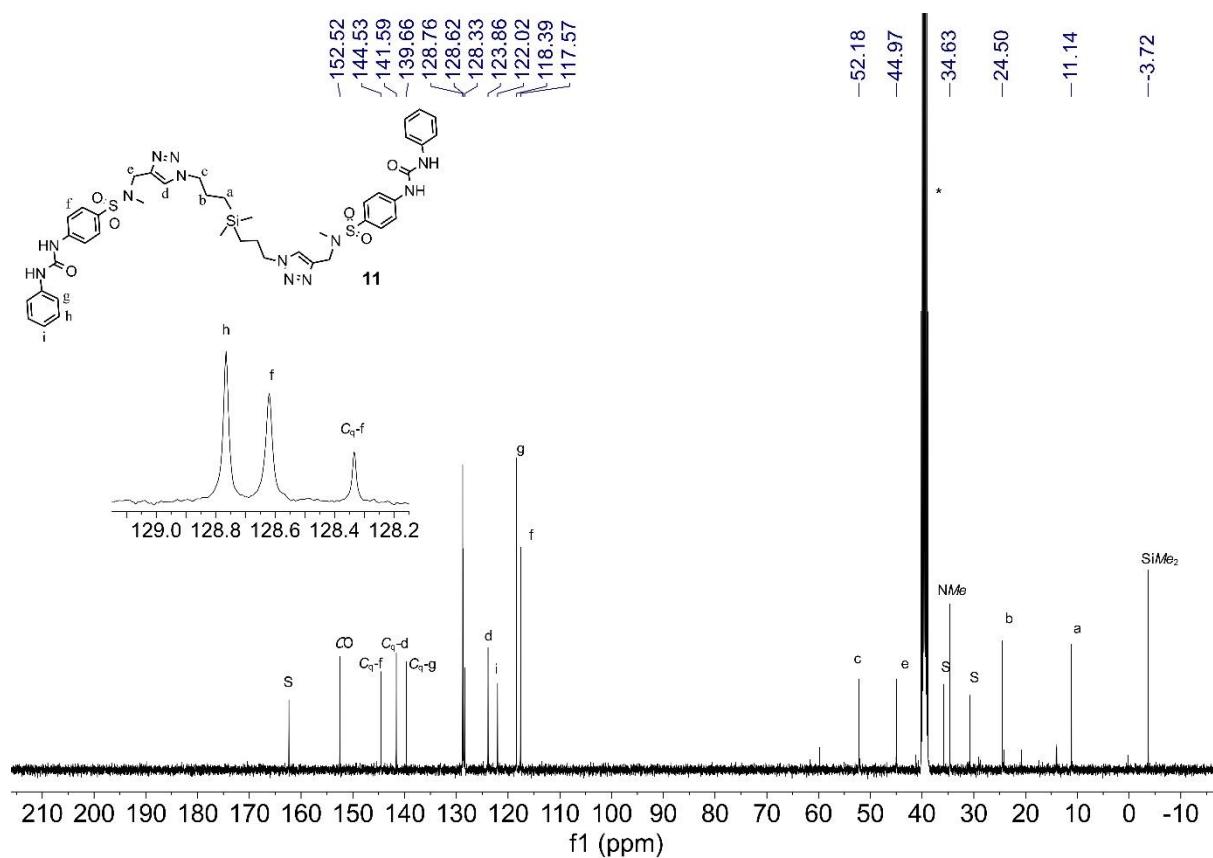

**Figure S22.** Compound **11**,  $^{29}\text{Si}$  { $^1\text{H}$ } NMR (79 MHz, DMSO- $d_6$ ).

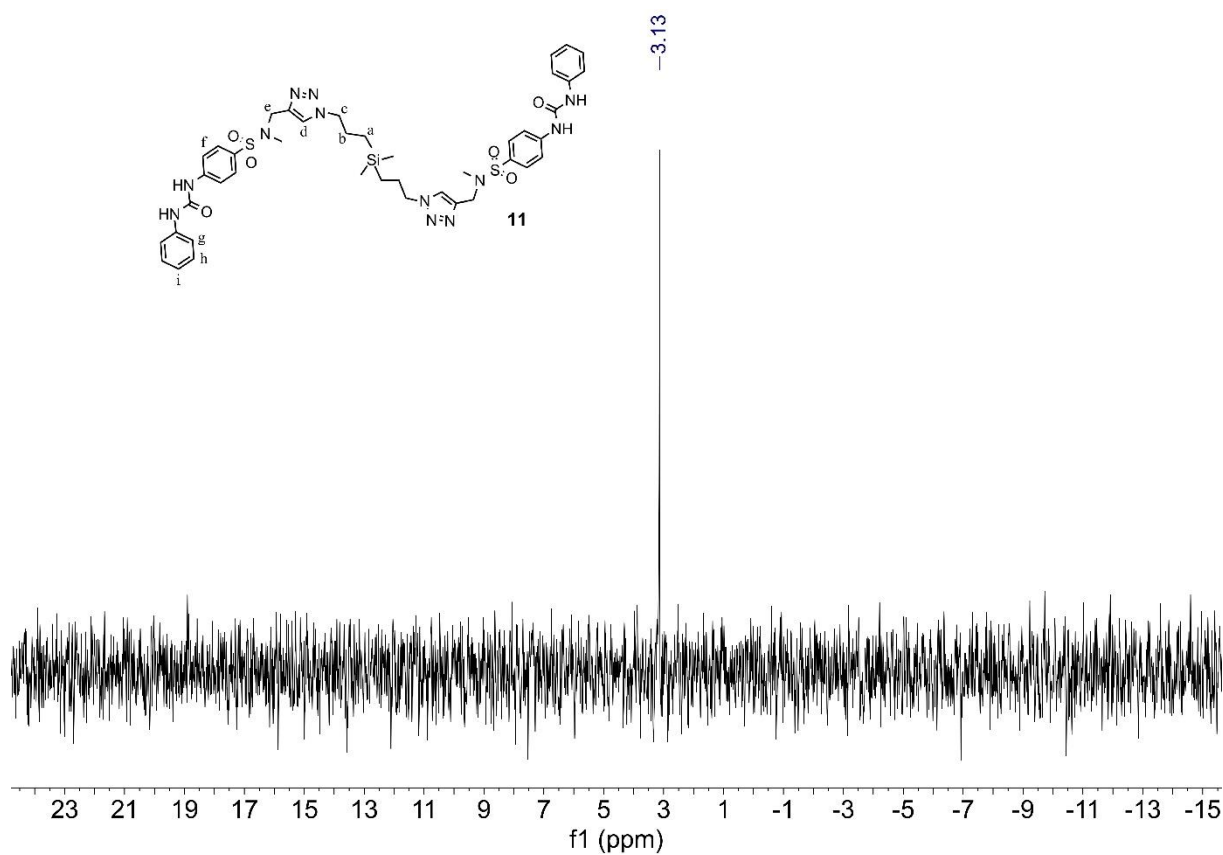

**Figure S23.** Compound **11**,  $^1\text{H}$ - $^{13}\text{C}$  HSQC NMR, (400/100 MHz,  $\text{DMSO-}d_6$ ).

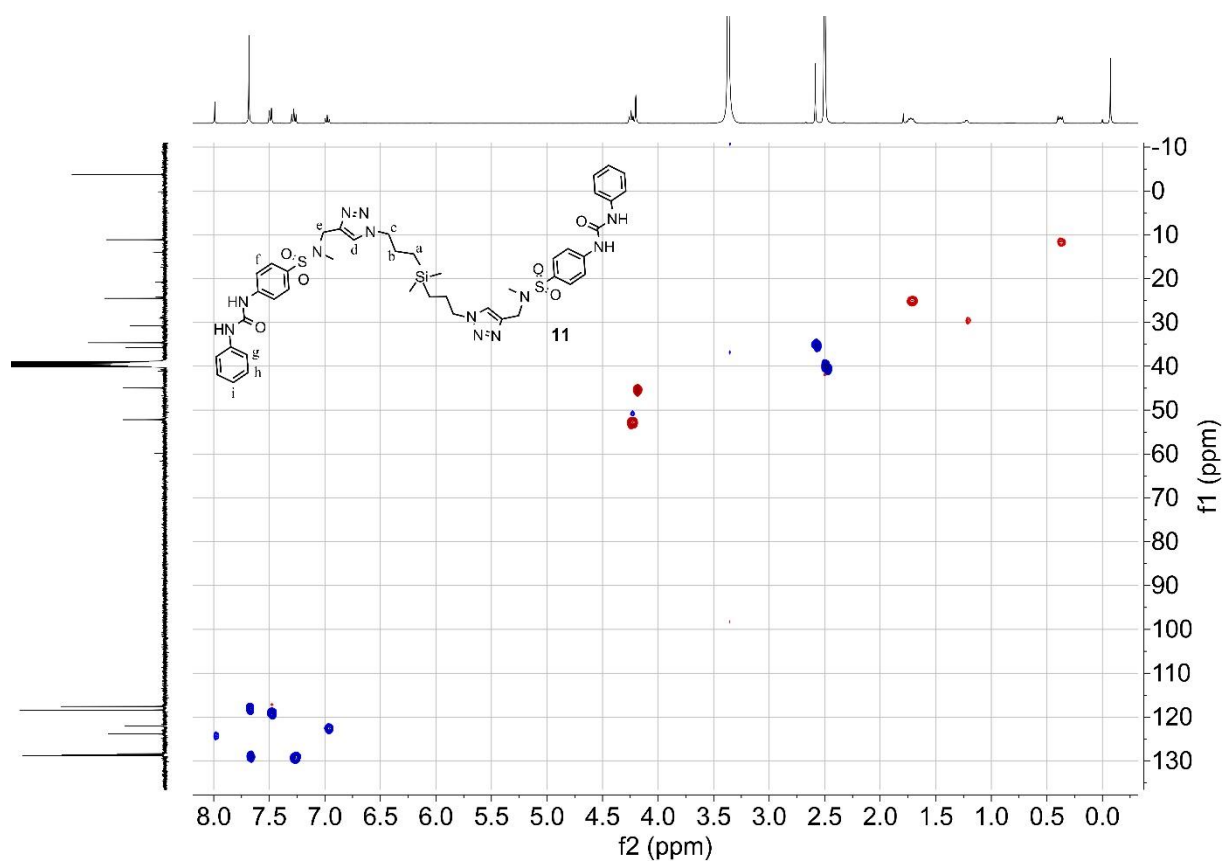

**Figure S24.** Compound **11**,  $^1\text{H}$ - $^{13}\text{C}$  HMBC NMR (400/100 MHz  $\text{DMSO-}d_6$ ).

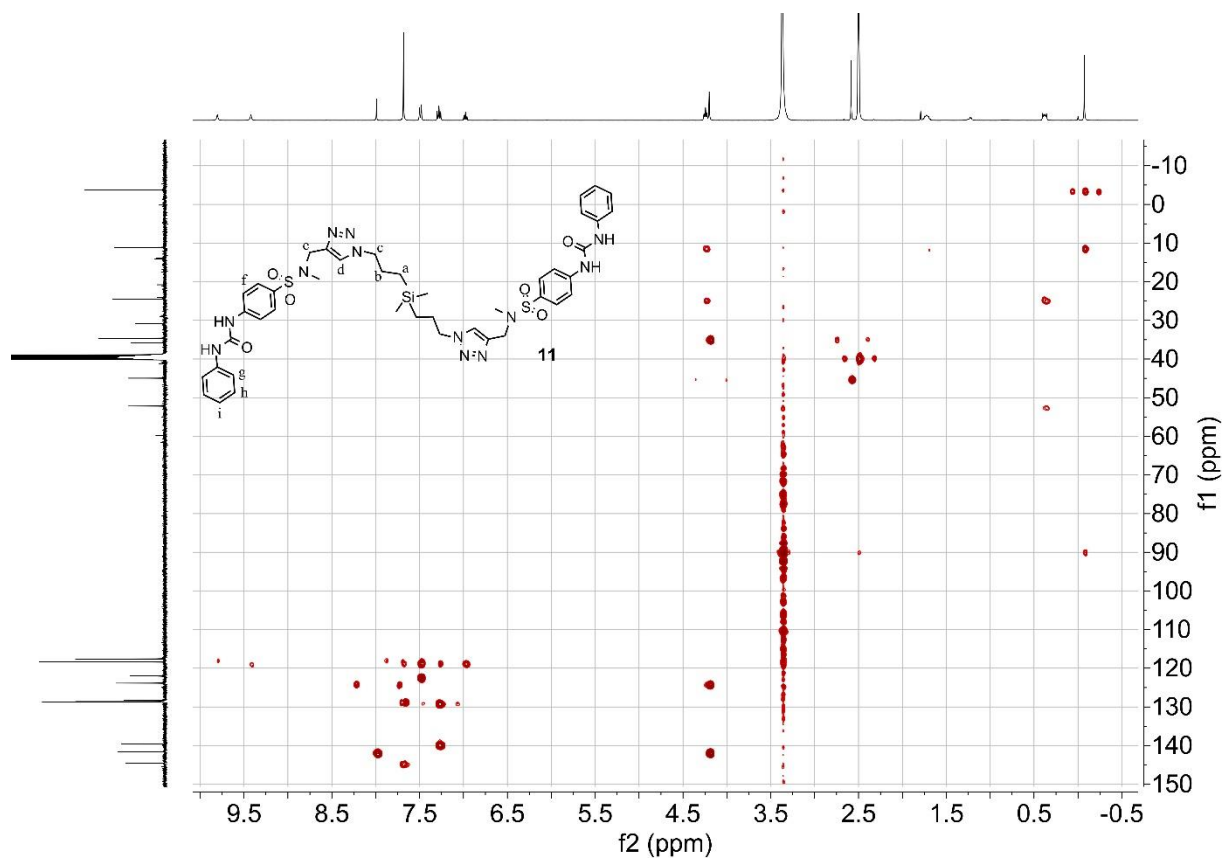

**Figure S25.** Compound **12**,  $^1\text{H}$  NMR (400 MHz,  $\text{DMSO}-d_6$ ).

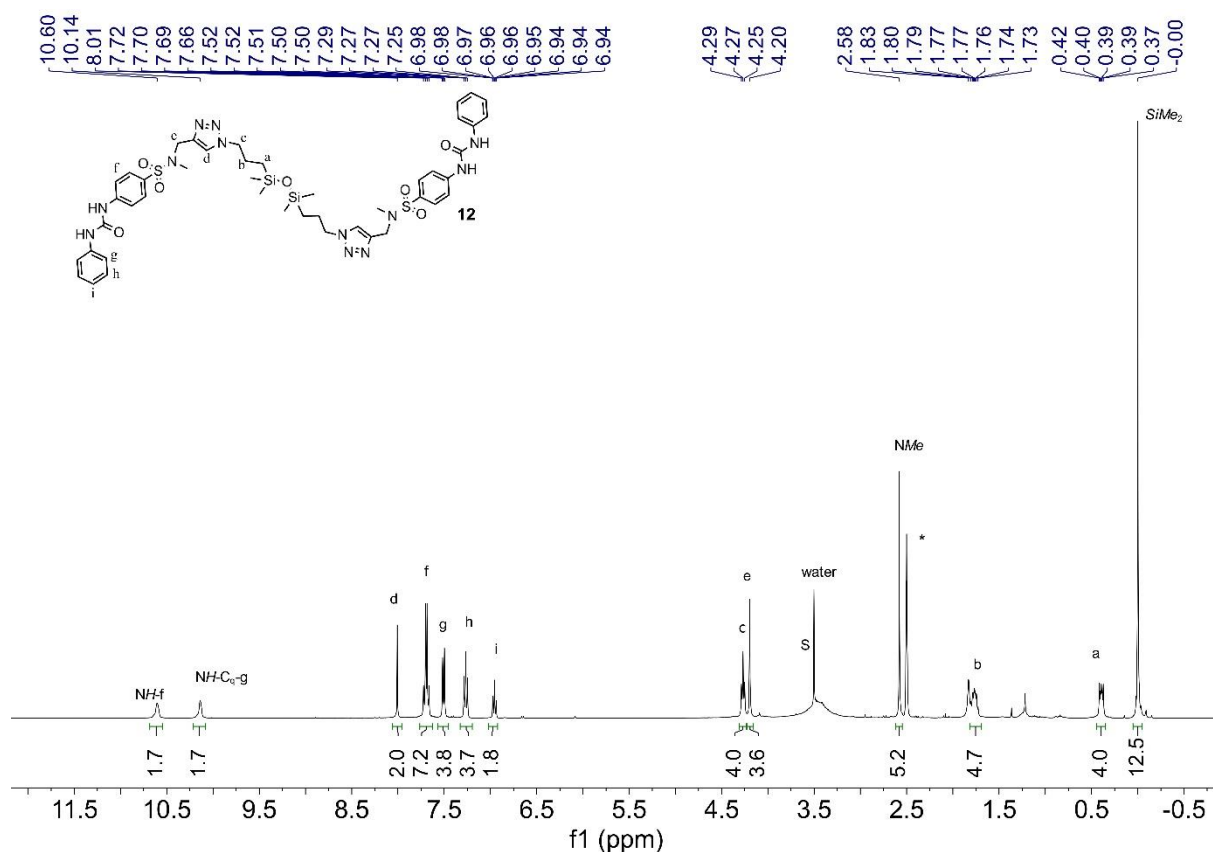

**Figure S26.** Compound **12**,  $^{13}\text{C}$  { $^1\text{H}$ } NMR (100 MHz,  $\text{DMSO}-d_6$ ).

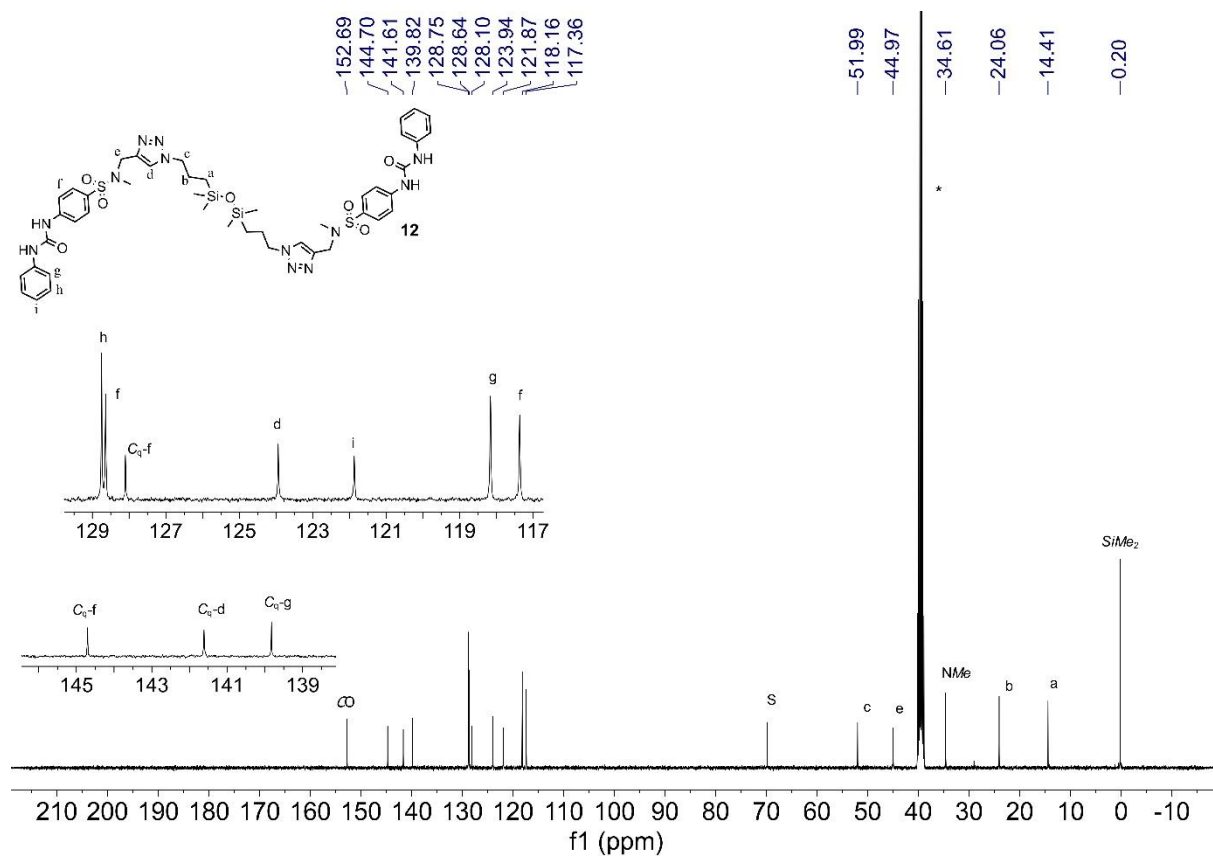

**Figure S27.** Compound **12**,  $^{29}\text{Si}$   $\{^1\text{H}\}$  NMR (79 MHz,  $\text{DMSO}-d_6$ ).

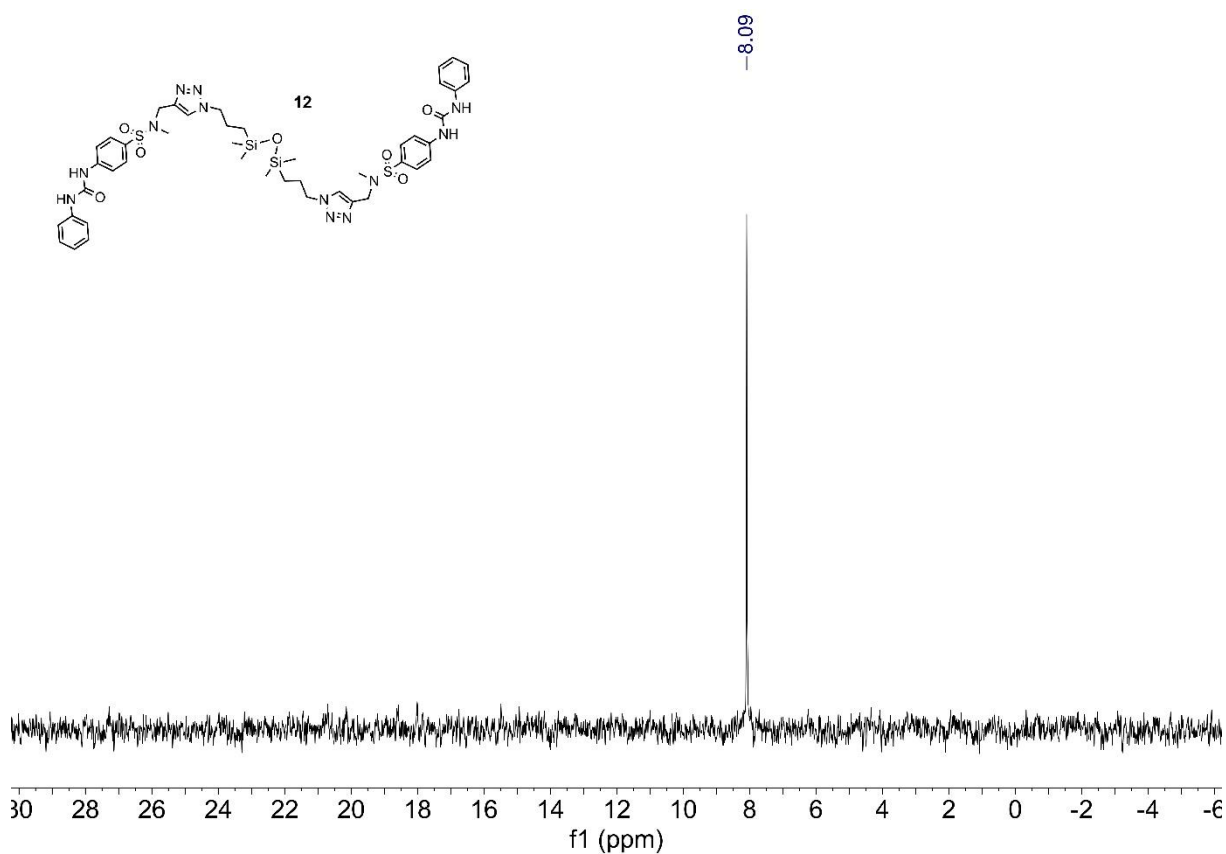

**Figure S28.** Compound **12**,  $^1\text{H}$ - $^1\text{H}$  COSY NMR (400 MHz,  $\text{DMSO}-d_6$ ).

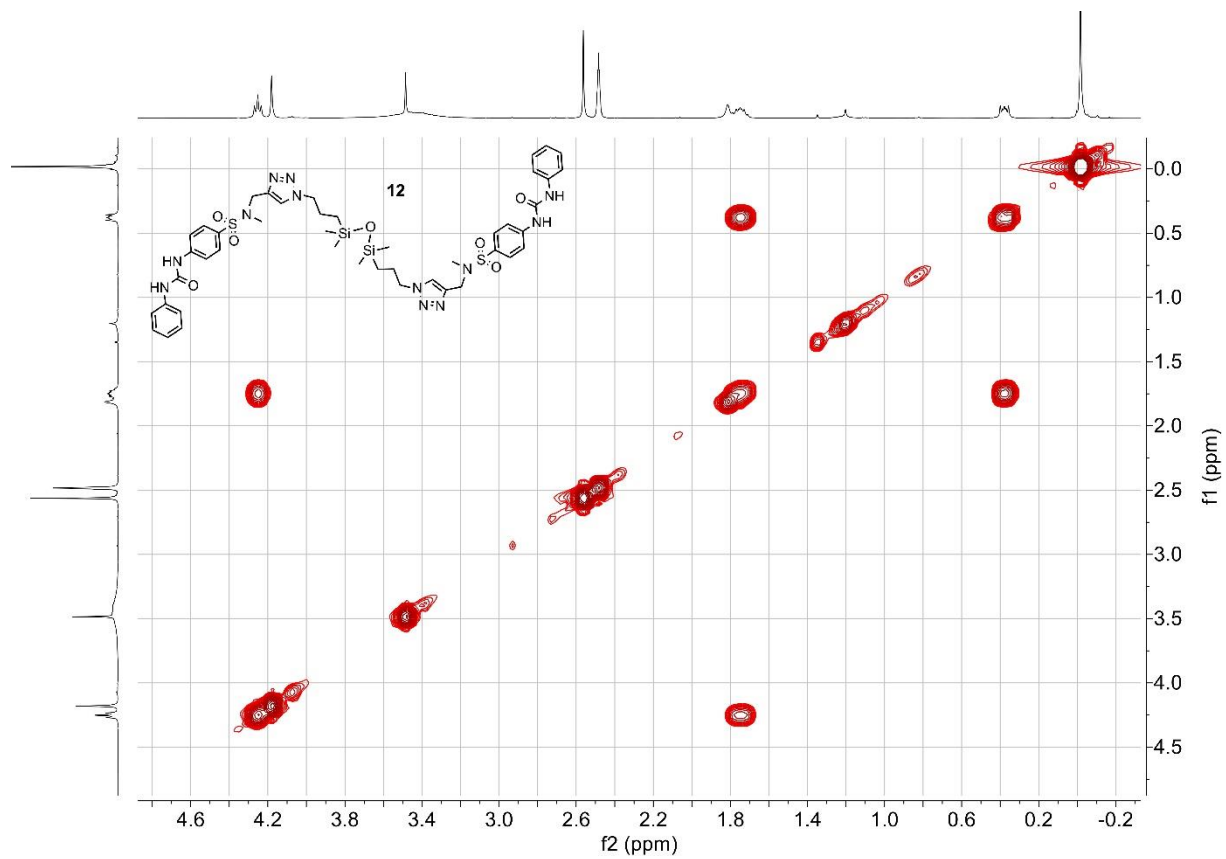

**Figure S29.** Compound **12**,  $^1\text{H}$ - $^{13}\text{C}$  HSQC NMR (400/100 MHz,  $\text{DMSO-}d_6$ ).

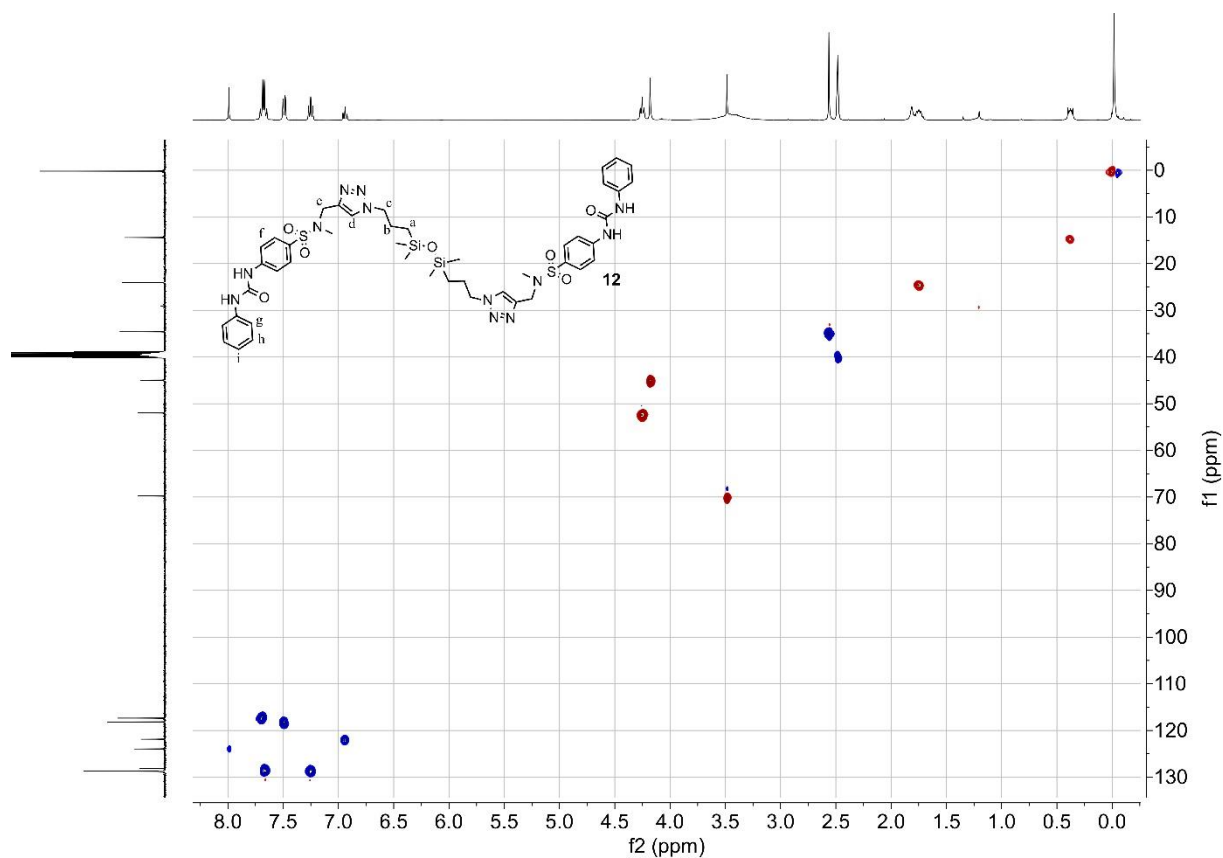

**Figure S30.** Compound **12**,  $^1\text{H}$ - $^{13}\text{C}$  HMBC NMR, (400/100 MHz,  $\text{DMSO-}d_6$ ).

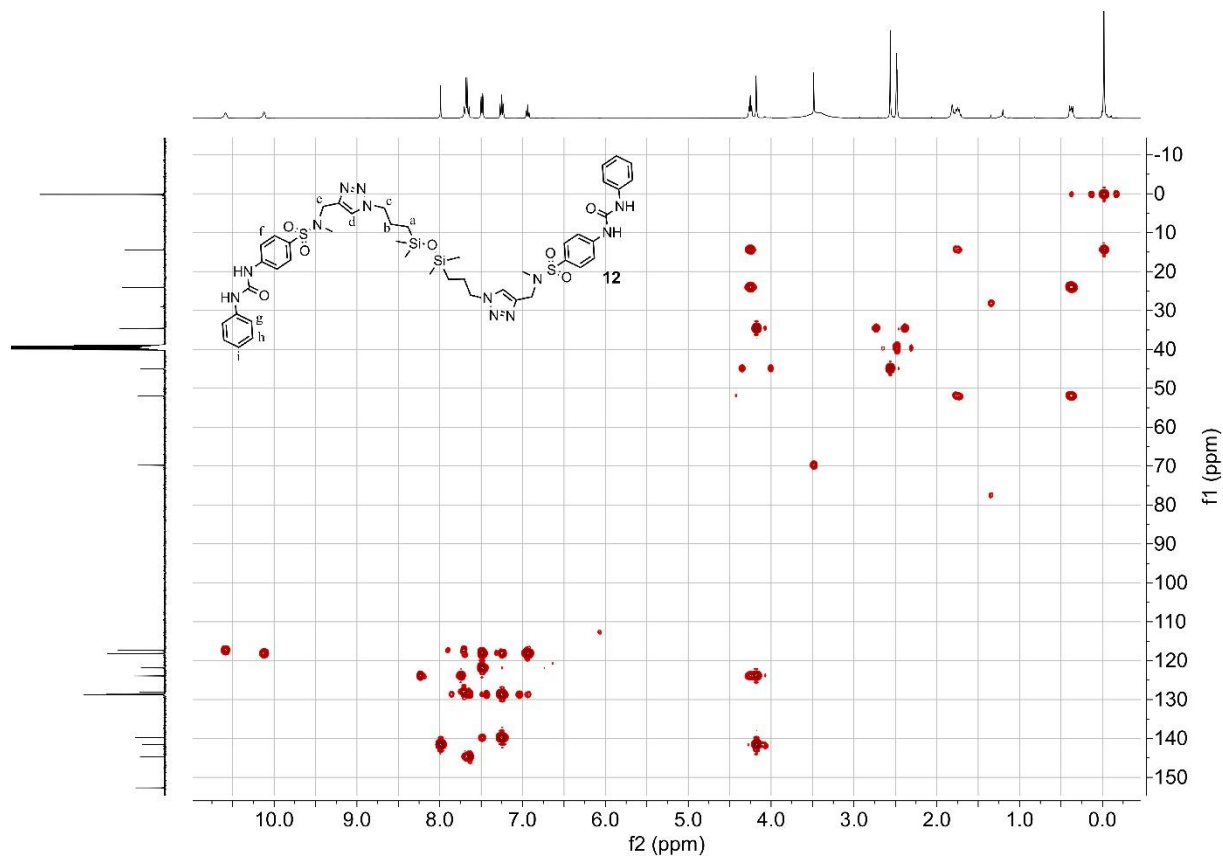



**Figure S31.** Compound **13**,  $^1\text{H}$  NMR (400 MHz,  $\text{DMSO}-d_6$ ).

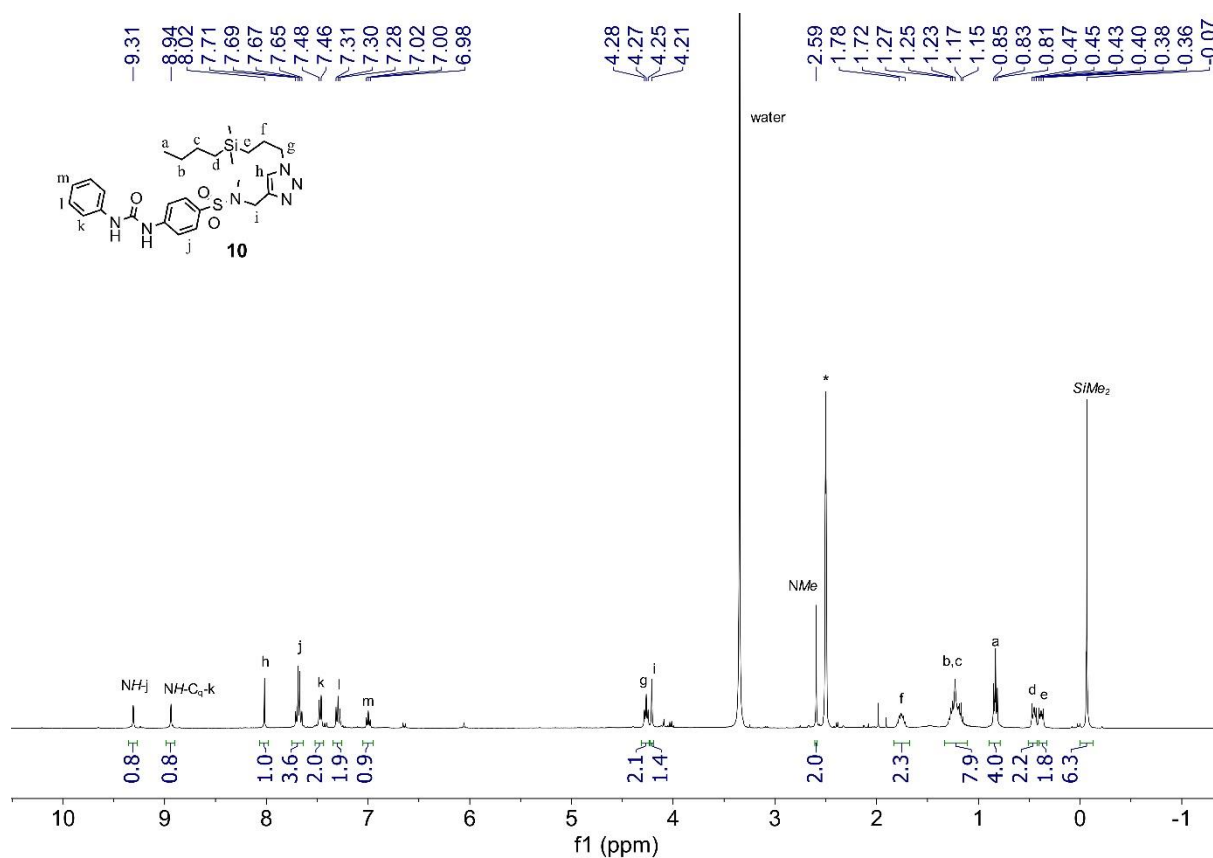

**Figure S32.** Compound **13**,  $^{13}\text{C}$   $\{^1\text{H}\}$  NMR (100 MHz,  $\text{DMSO}-d_6$ ).

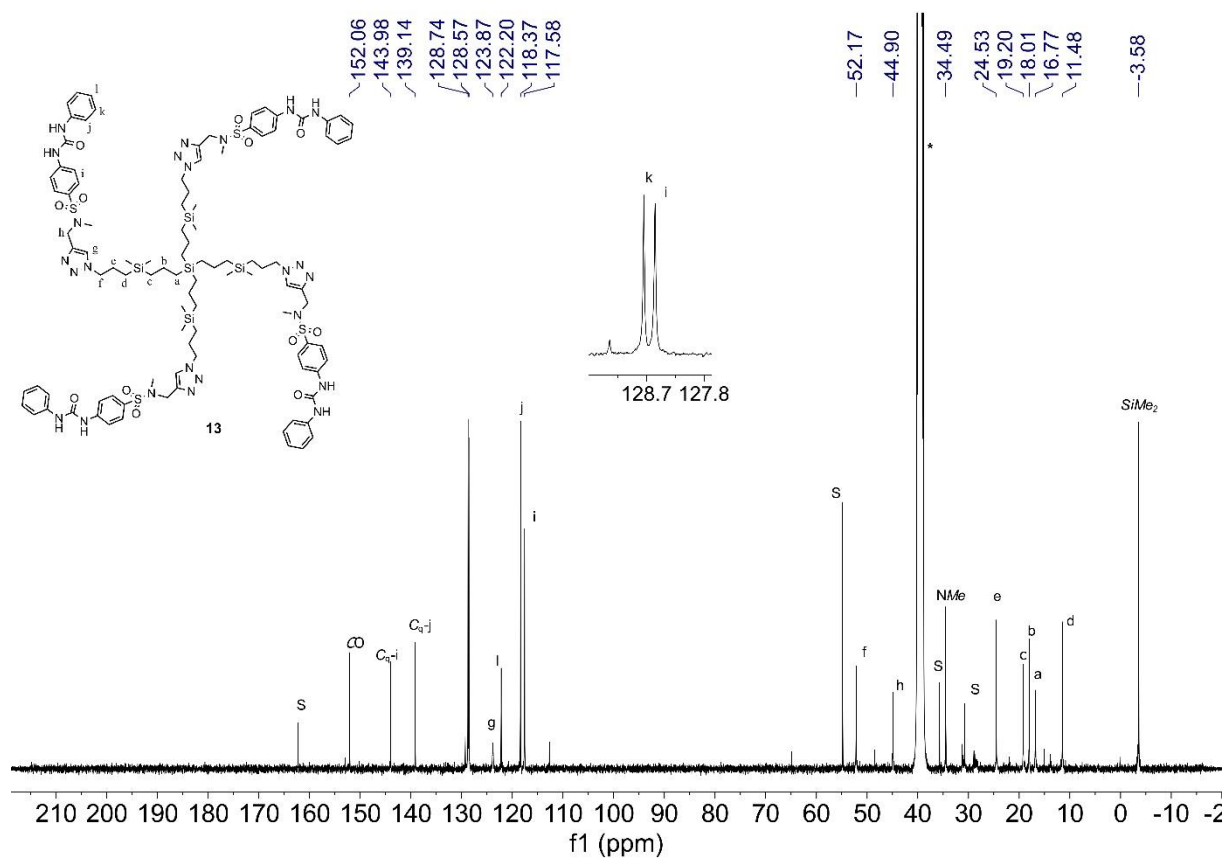

**Figure S33.** Compound **13**,  $^{29}\text{Si}$   $\{^1\text{H}\}$  NMR (79 MHz,  $\text{DMSO}-d_6$ ).

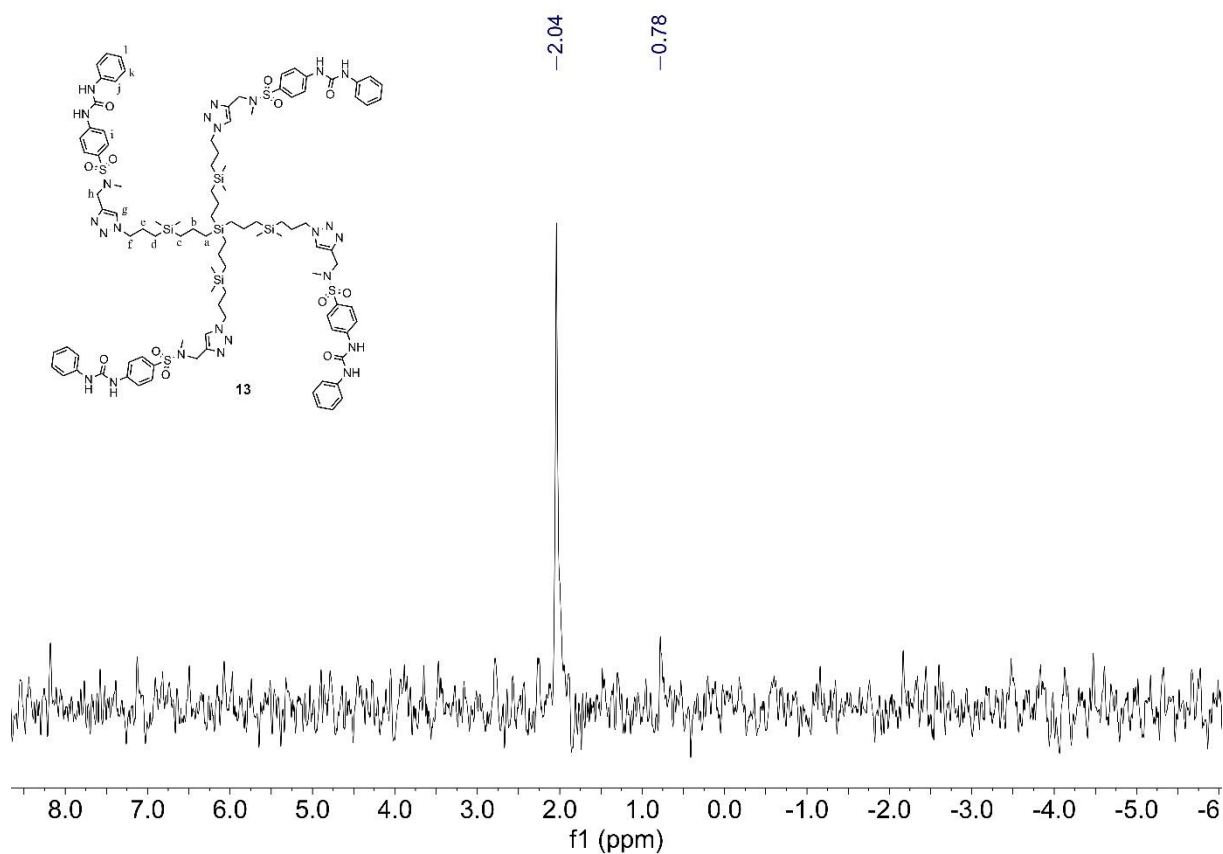

**Figure S34.** Compound **13**,  $^1\text{H}$ - $^1\text{H}$  COSY NMR, (400 MHz,  $\text{DMSO}-d_6$ ).

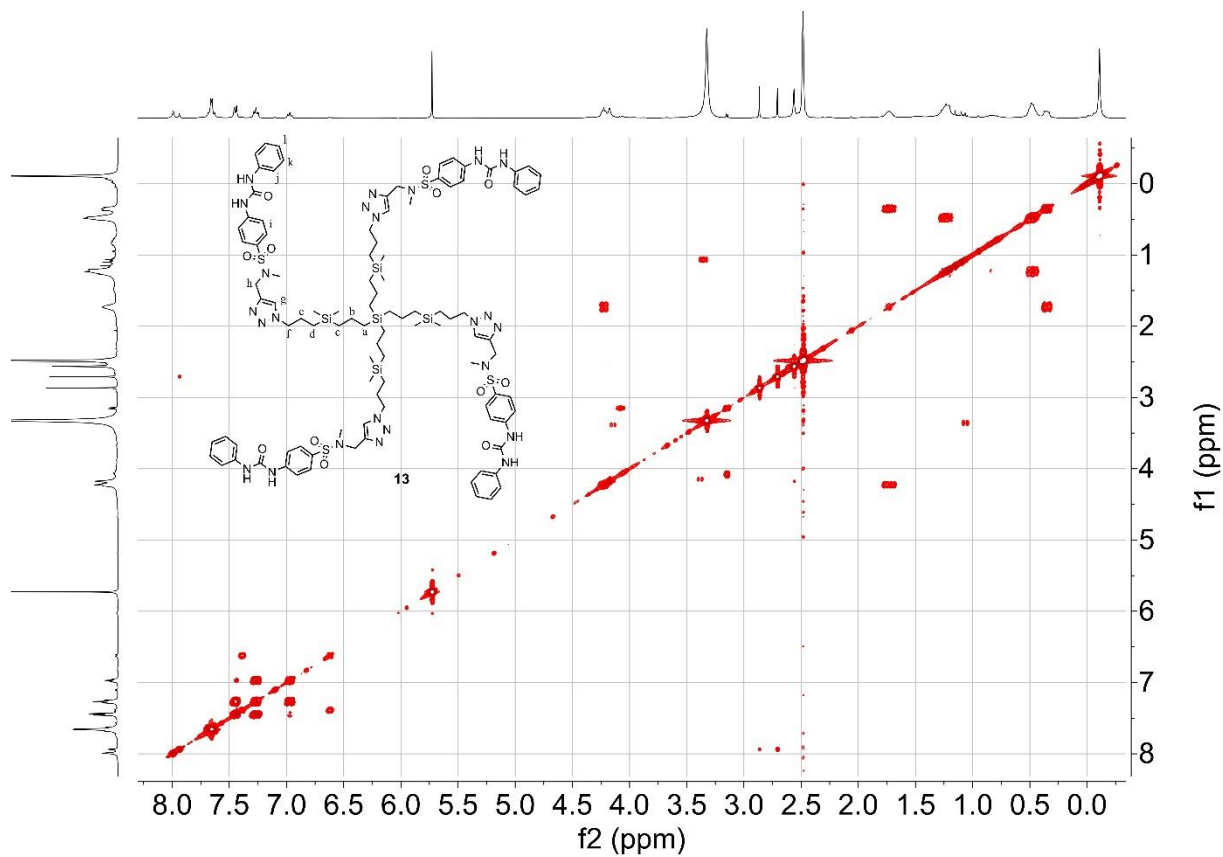

**Figure S35.** Compound **13**,  $^1\text{H}$ - $^{13}\text{C}$  HSQC NMR (400/100 MHz,  $\text{DMSO-}d_6$ ).

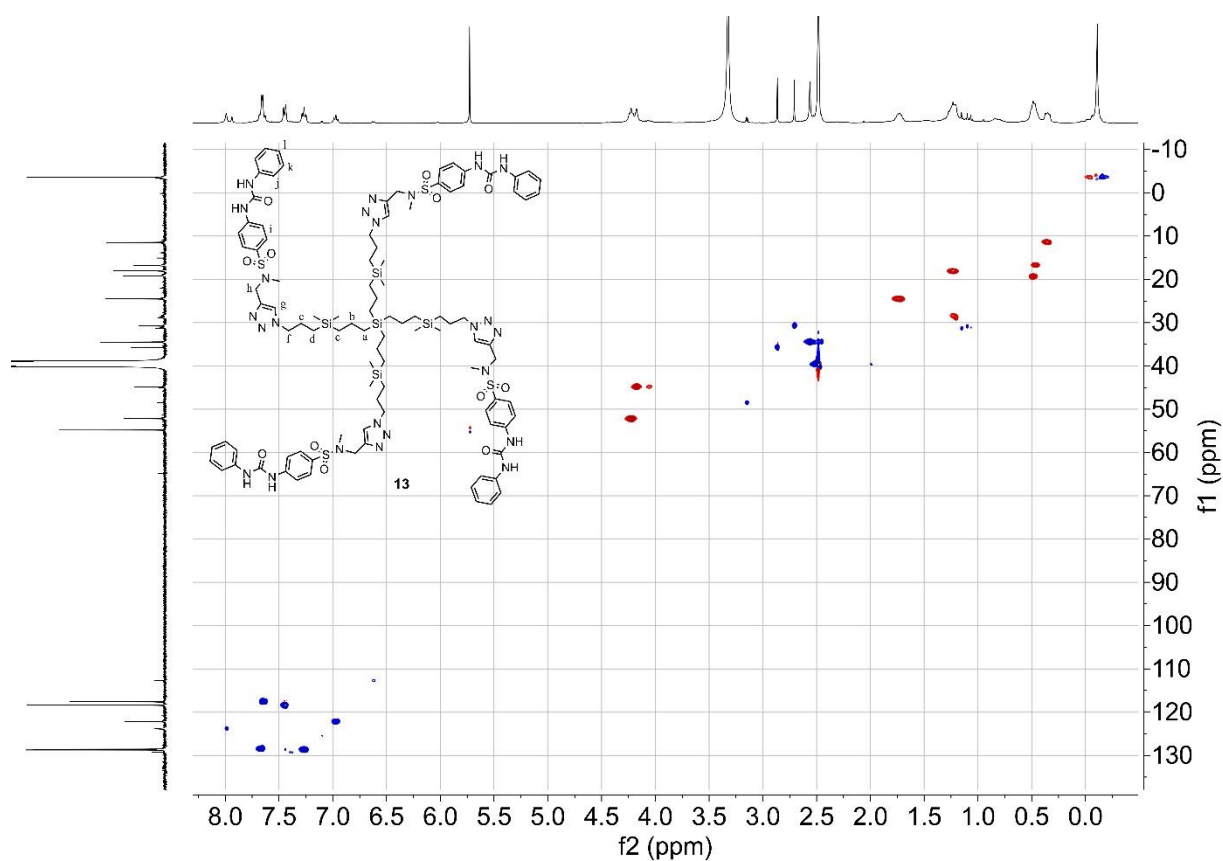

**Figure S36.** Compound **13**,  $^1\text{H}$ - $^{13}\text{C}$  HMBC NMR (400/100 MHz,  $\text{DMSO-}d_6$ ).

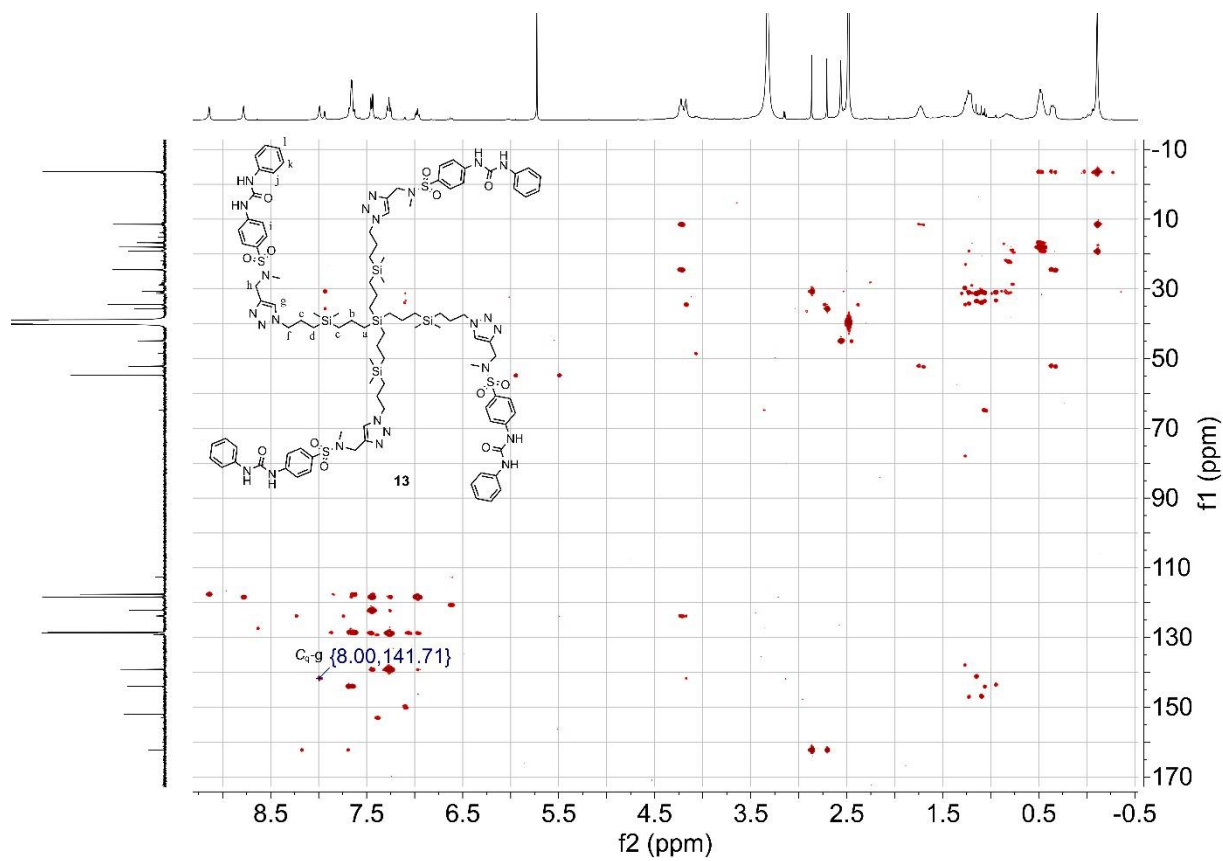

**Figure S37.** Compound **14**,  $^1\text{H}$  NMR (400 MHz,  $\text{DMSO}-d_6$ ).

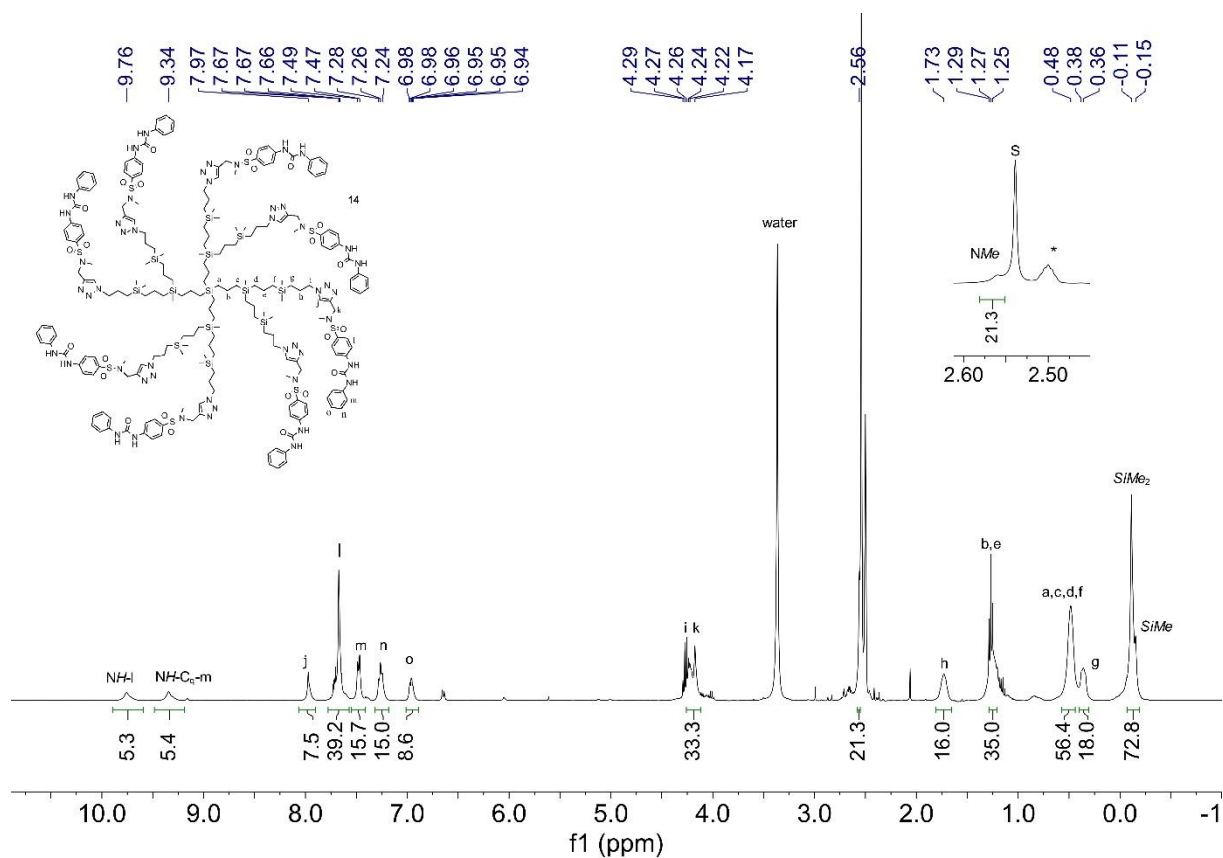

**Figure S38.** Compound **14**,  $^{13}\text{C}$   $\{^1\text{H}\}$  NMR (100 MHz,  $\text{DMSO}-d_6$ ).

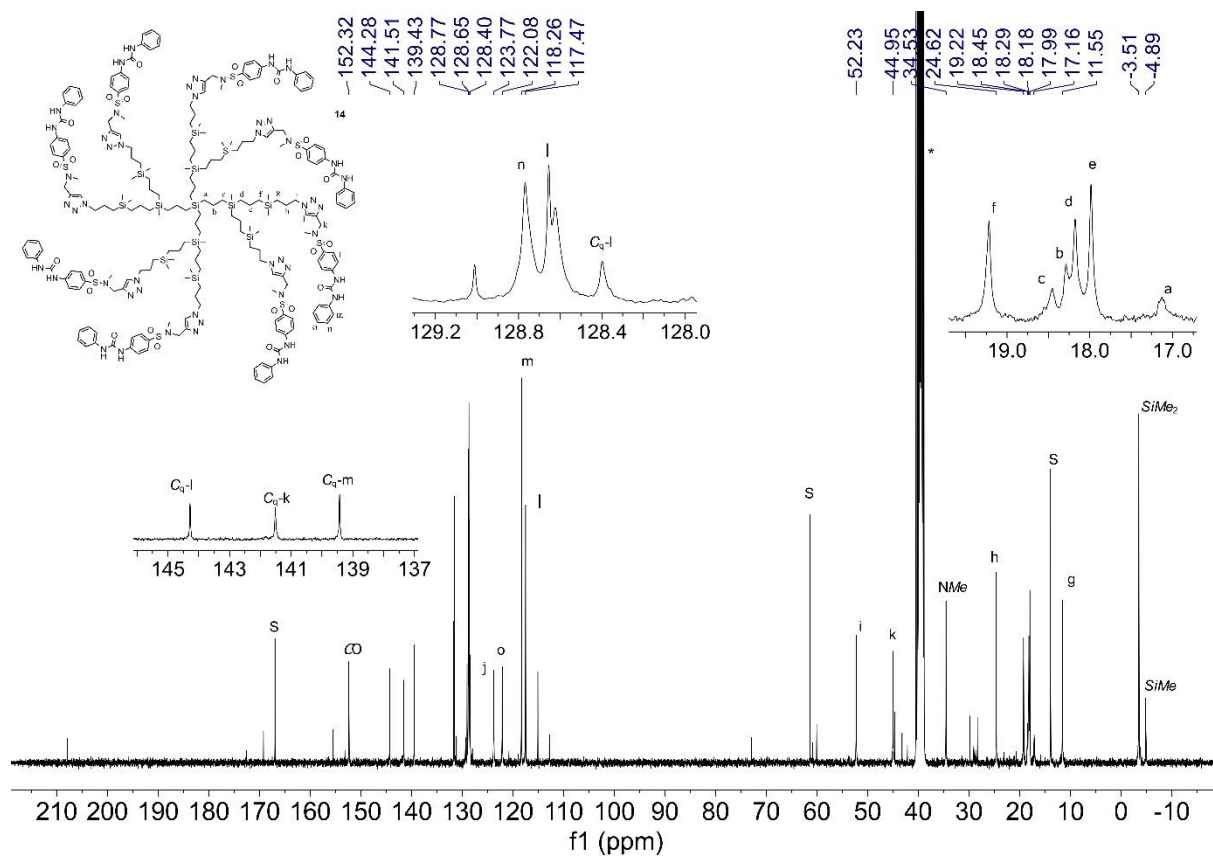

**Figure S39.** Compound **14**,  $^{29}\text{Si}$   $\{^1\text{H}\}$  NMR (79 MHz,  $\text{DMSO}-d_6$ ).

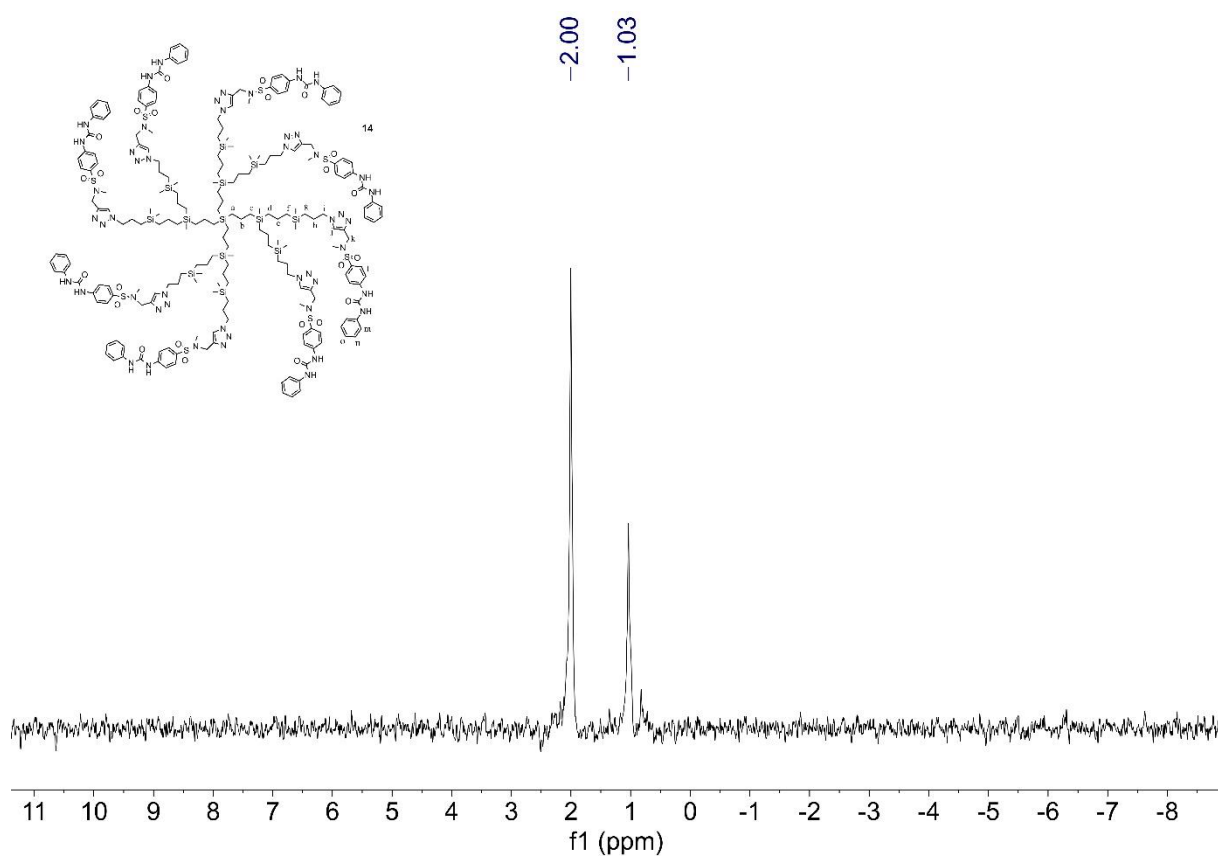

**Figure S40.** Compound **14**,  $^1\text{H}$ - $^1\text{H}$  COSY NMR, (400 MHz,  $\text{DMSO}-d_6$ ).

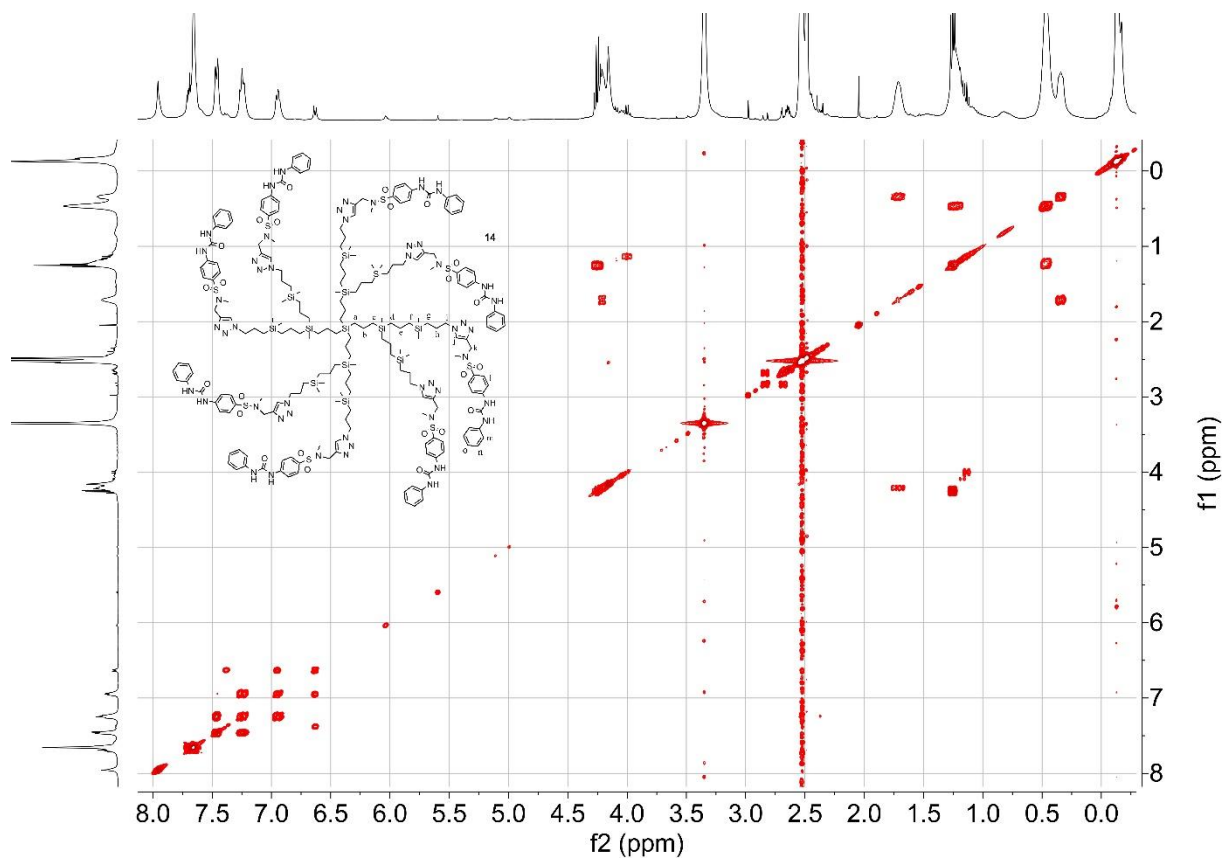

**Figure S41.** Compound **14**,  $^1\text{H}$ - $^{13}\text{C}$  HSQC NMR (400/100 MHz,  $\text{DMSO-}d_6$ ).

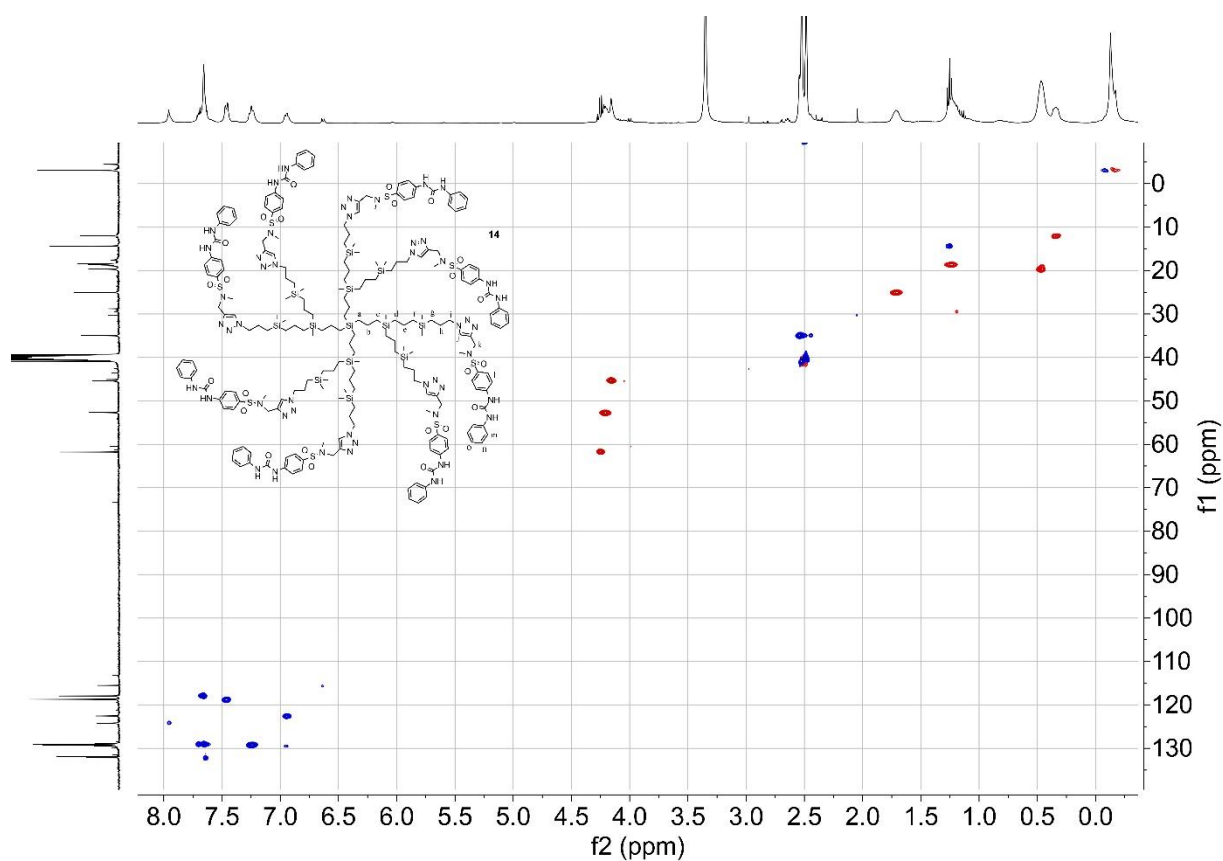

**Figure S42.** Compound **14**,  $^1\text{H}$ - $^{13}\text{C}$  HMBC NMR, (400/100 MHz,  $\text{DMSO-}d_6$ ).

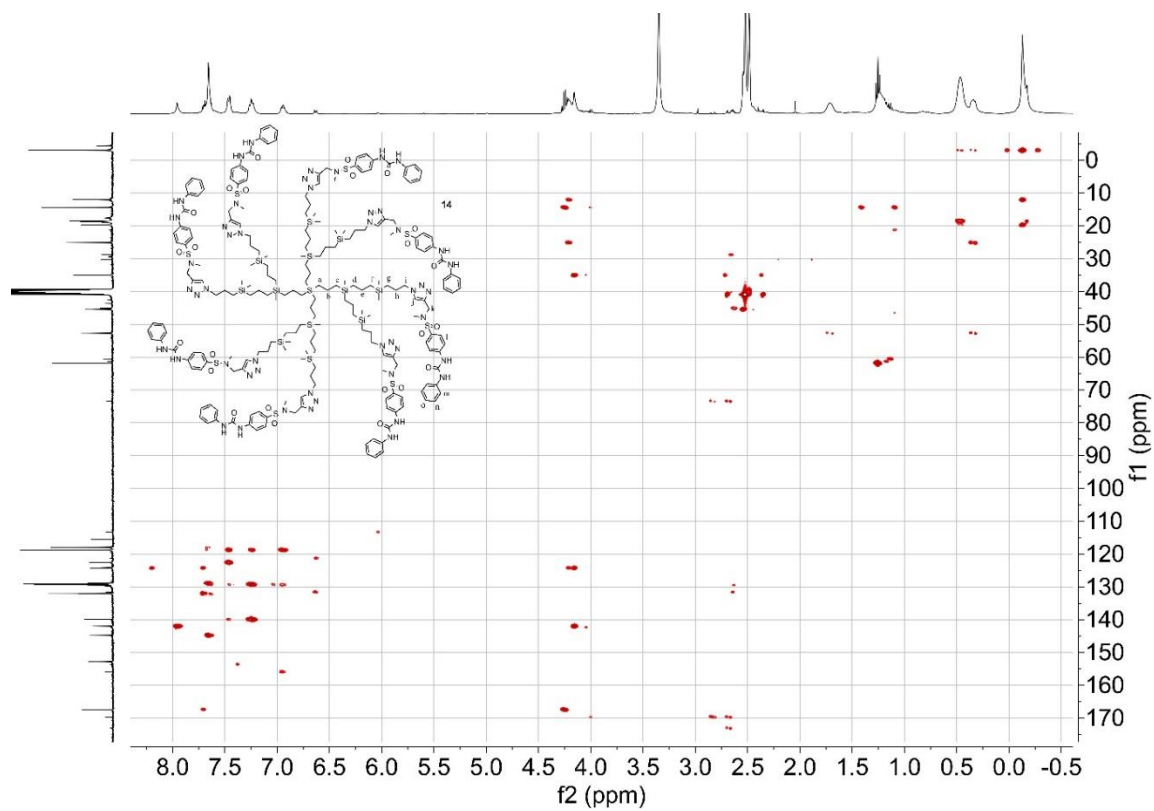

## UV and $^1\text{H}$ NMR titration data with links to on-line saved fits.

| c 10,<br>[mol/L] | c anion<br>[mol/L] | A $\lambda = 300$<br>nm [AU] |
|------------------|--------------------|------------------------------|
| 0.0004           | 0                  | 0.220                        |
| 0.0004           | 0.0001             | 0.316                        |
| 0.0004           | 0.0003             | 0.401                        |
| 0.0004           | 0.0004             | 0.456                        |
| 0.0004           | 0.0006             | 0.531                        |
| 0.0004           | 0.0008             | 0.586                        |
| 0.0004           | 0.0011             | 0.630                        |
| 0.0004           | 0.0015             | 0.681                        |
| 0.0004           | 0.0018             | 0.719                        |
| 0.0004           | 0.0024             | 0.748                        |
| 0.0004           | 0.0028             | 0.771                        |
| 0.0004           | 0.0032             | 0.782                        |

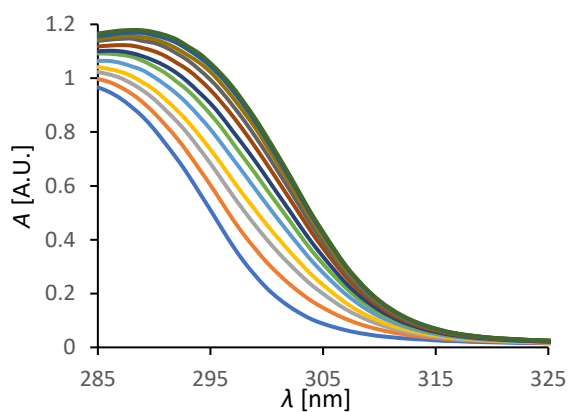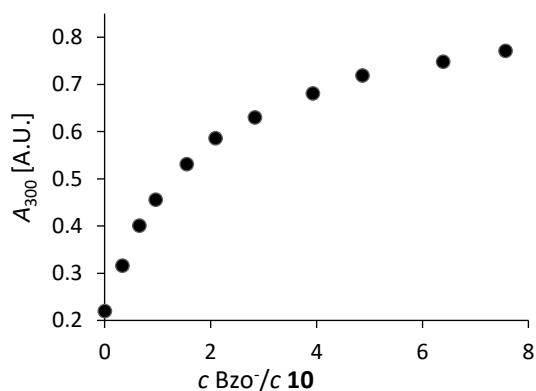

<http://app.supramolecular.org/bindfit/view/3afbb4ea-5219-4686-b379-62f8c79ffa40>

**Figure S43.** Receptor **10**, UV-Vis titration by  $\text{TBA}^+\text{BzO}^-$  in DMSO.

| c 10,<br>[mol/L] | c anion<br>[mol/L] | A $\lambda = 300$<br>nm [AU] |
|------------------|--------------------|------------------------------|
| 0.0003           | 0                  | 0.149                        |
| 0.0003           | 0.0001             | 0.183                        |
| 0.0003           | 0.0002             | 0.220                        |
| 0.0003           | 0.0003             | 0.249                        |
| 0.0003           | 0.0004             | 0.294                        |
| 0.0003           | 0.0006             | 0.328                        |
| 0.0003           | 0.0008             | 0.360                        |
| 0.0003           | 0.0011             | 0.393                        |
| 0.0003           | 0.0013             | 0.416                        |
| 0.0003           | 0.0017             | 0.443                        |
| 0.0003           | 0.0020             | 0.441                        |
| 0.0003           | 0.0023             | 0.458                        |

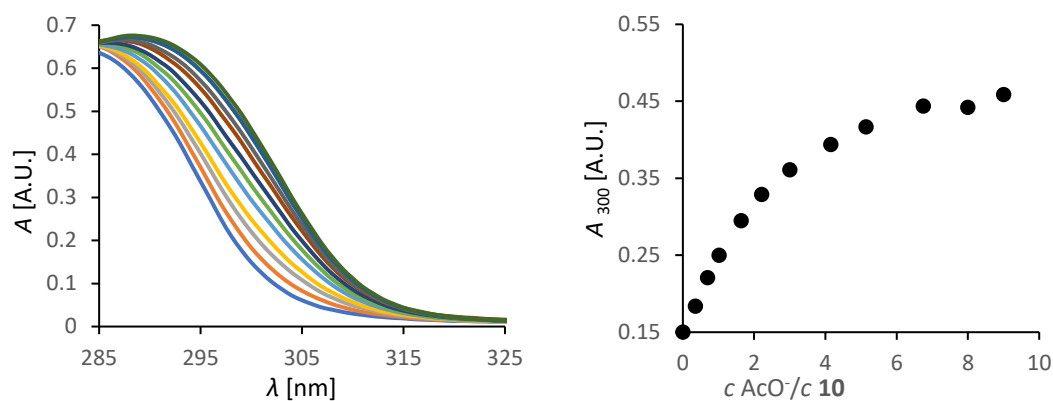

<http://app.supramolecular.org/bindfit/view/7a8d506c-48d4-4f42-a0bb-c4761ed51715>

**Figure S44.** Receptor **10**, UV-Vis titration by TBA<sup>+</sup>AcO<sup>-</sup> in DMSO.

| c <b>10</b> ,<br>[mol/L] | c anion<br>[mol/L] | A λ = 300<br>nm [AU] |
|--------------------------|--------------------|----------------------|
| 0.0004                   | 0                  | 0.222                |
| 0.0004                   | 0.0001             | 0.357                |
| 0.0004                   | 0.0003             | 0.448                |
| 0.0004                   | 0.0004             | 0.505                |
| 0.0004                   | 0.0006             | 0.567                |
| 0.0004                   | 0.0008             | 0.596                |
| 0.0004                   | 0.0011             | 0.638                |
| 0.0004                   | 0.0015             | 0.674                |
| 0.0004                   | 0.0019             | 0.685                |
| 0.0004                   | 0.0025             | 0.705                |
| 0.0004                   | 0.0029             | 0.715                |
| 0.0004                   | 0.0033             | 0.717                |

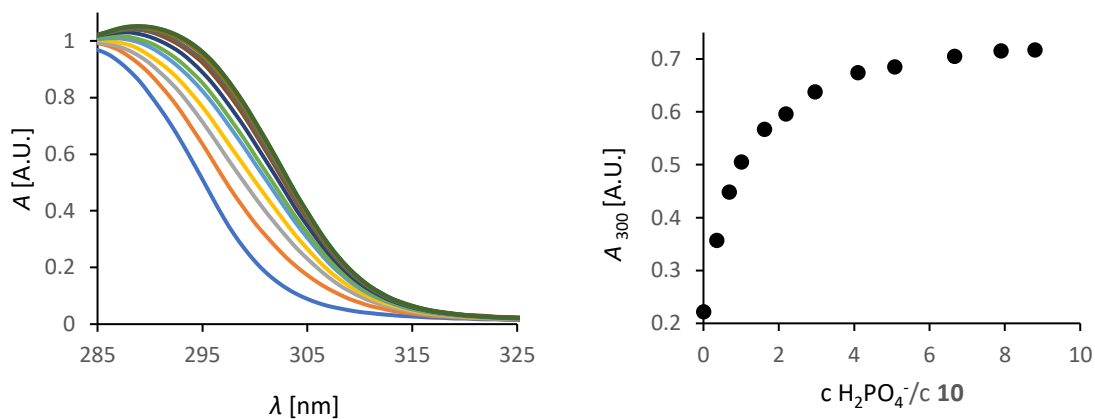

<http://app.supramolecular.org/bindfit/view/160e65a4-6e1f-4356-8535-fabcca234f52>

**Figure S45.** Receptor **10**, UV-Vis titration by TBA<sup>+</sup> H<sub>2</sub>PO<sub>4</sub><sup>-</sup> in DMSO.



| c 10,<br>[mol/L] | c anion<br>[mol/L] | $\Delta\delta$ ArH<br>[Hz] |
|------------------|--------------------|----------------------------|
| 0.0042           | 0                  | 0                          |
| 0.0042           | 0.0005             | 9.0                        |
| 0.0042           | 0.0010             | 19.2                       |
| 0.0042           | 0.0014             | 30.1                       |
| 0.0042           | 0.0023             | 43.4                       |
| 0.0042           | 0.0031             | 56.2                       |
| 0.0042           | 0.0043             | 65.8                       |
| 0.0042           | 0.0059             | 74.9                       |
| 0.0042           | 0.0073             | 79.0                       |
| 0.0042           | 0.0096             | 79.6                       |
| 0.0042           | 0.0114             | 80.9                       |
| 0.0042           | 0.0256             | 80.9                       |

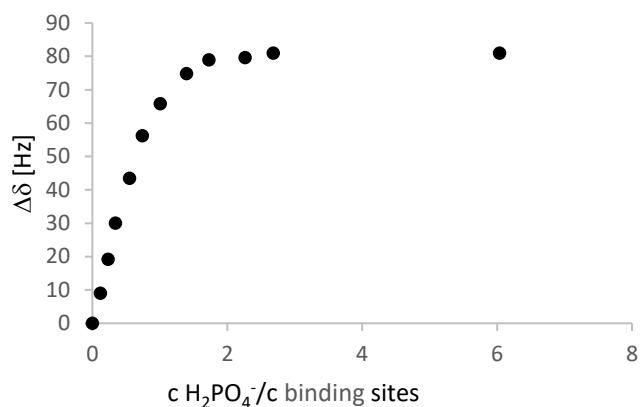

<http://app.supramolecular.org/bindfit/view/95a8ac42-cf0e-487e-8785-48bec7d46cdd>

**Figure S46.** Receptor **10**, <sup>1</sup>H NMR titration by TBA<sup>+</sup>H<sub>2</sub>PO<sub>4</sub><sup>-</sup> in DMSO-*d*<sub>6</sub>, ArH.

| c 10,<br>[mol/L] | c anion<br>[mol/L] | $\Delta\delta$ ArH<br>[Hz] |
|------------------|--------------------|----------------------------|
| 0.004545         | 0                  | 0                          |
| 0.004545         | 0.000552           | 9.45                       |
| 0.004545         | 0.001084           | 18.3                       |
| 0.004545         | 0.001595           | 26.1                       |
| 0.004545         | 0.002561           | 39.9                       |
| 0.004545         | 0.00346            | 52.3                       |
| 0.004545         | 0.004695           | 61.1                       |
| 0.004545         | 0.006501           | 73.1                       |
| 0.004545         | 0.008049           | 77.0                       |
| 0.004545         | 0.010565           | 77.9                       |
| 0.004545         | 0.012521           | 78.2                       |
| 0.004545         | 0.028173           | 84.8                       |

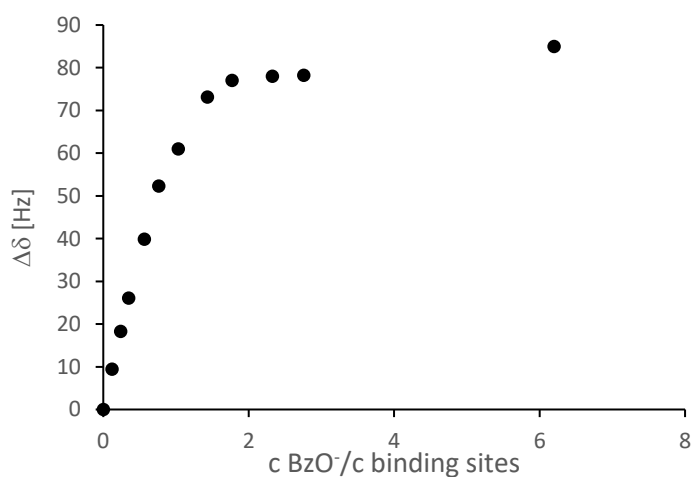

<http://app.supramolecular.org/bindfit/view/b743ab76-5f6e-4aa9-9852-4c9d3ffa4d8d>

**Figure S47.** Receptor **10**, <sup>1</sup>H NMR titration by TBA<sup>+</sup>BzO<sup>-</sup> in DMSO-*d*<sub>6</sub>, ArH

| c 10,<br>[mol/L] | c anion<br>[mol/L] | $\Delta\delta$ NH<br>[Hz] |
|------------------|--------------------|---------------------------|
| 0.003483         | 0                  | 0                         |
| 0.003483         | 0.000522           | 9.0                       |
| 0.003483         | 0.001024           | 17.1                      |
| 0.003483         | 0.001507           | 27.9                      |
| 0.003483         | 0.00242            | 40.1                      |
| 0.003483         | 0.00327            | 53.1                      |
| 0.003483         | 0.004437           | 61.2                      |

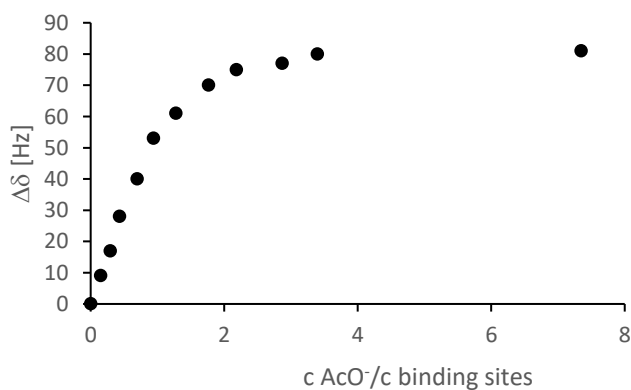

|          |          |      |
|----------|----------|------|
| 0.003483 | 0.006144 | 70.0 |
| 0.003483 | 0.007607 | 75.1 |
| 0.003483 | 0.009984 | 77.4 |
| 0.003483 | 0.011833 | 80.1 |
| 0.003483 | 0.025593 | 80.9 |

<http://app.supramolecular.org/bindfit/view/3d4a8ae0-6699-470d-8126-6cfe884a56c5>

**Figure S48.** Receptor **10**,  $^1\text{H}$  NMR titration by  $\text{TBA}^+\text{AcO}^-$  in  $\text{DMSO-}d_6$ , ArH.

| c 10,<br>[mol/L] | c anion<br>[mol/L] | $\Delta\delta$ NH<br>[Hz] |
|------------------|--------------------|---------------------------|
| 0.0053           | 0                  | 0                         |
| 0.0053           | 0.0004             | 16.1                      |
| 0.0053           | 0.0008             | 27.7                      |
| 0.0053           | 0.0012             | 38.8                      |
| 0.0053           | 0.0019             | 59.9                      |
| 0.0053           | 0.0026             | 75.4                      |
| 0.0053           | 0.0035             | 100.0                     |
| 0.0053           | 0.0049             | 128.9                     |
| 0.0053           | 0.0061             | 153.1                     |
| 0.0053           | 0.0080             | 175.4                     |
| 0.0053           | 0.0094             | 197.6                     |
| 0.0053           | 0.0213             | 333.0                     |
| 0.0053           | 0.0426             | 438.0                     |

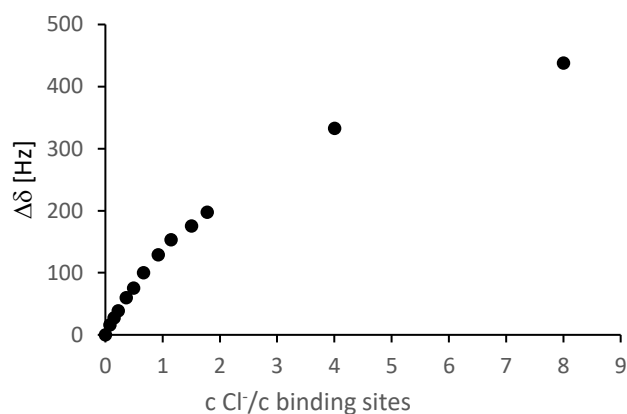

<http://app.supramolecular.org/bindfit/view/b455ac26-8c28-4b87-942c-de90af77ba71>

**Figure S49.** Receptor **10**,  $^1\text{H}$  NMR titration by  $\text{TBA}^+\text{Cl}^-$  in  $\text{DMSO-}d_6$ , NH.

| c 10,<br>[mol/L] | c anion<br>[mol/L] | $\Delta\delta$ NH<br>[Hz] |
|------------------|--------------------|---------------------------|
| 0.0044           | 0                  | 0                         |
| 0.0044           | 0.0004             | 0.9                       |
| 0.0044           | 0.0009             | 2.2                       |
| 0.0044           | 0.0013             | 3.5                       |
| 0.0044           | 0.0020             | 5.7                       |
| 0.0044           | 0.0031             | 8.6                       |
| 0.0044           | 0.0047             | 12.3                      |
| 0.0044           | 0.0059             | 15.9                      |
| 0.0044           | 0.0081             | 21.5                      |
| 0.0044           | 0.0097             | 24.7                      |
| 0.0044           | 0.021              | 49                        |
| 0.0044           | 0.043              | 87.7                      |

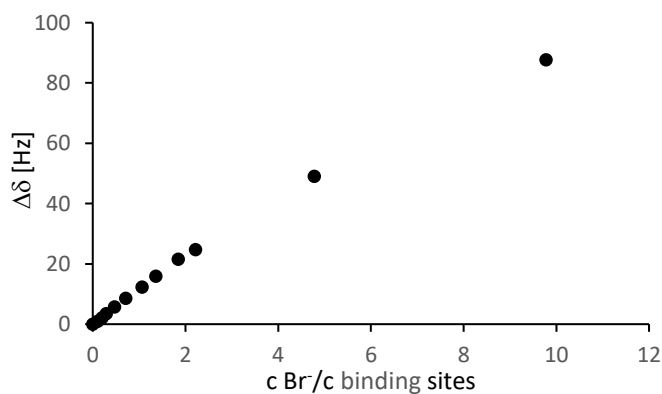

<http://app.supramolecular.org/bindfit/view/30129ef1-03e7-4f67-84b5-1ab69134b36a>

**Figure S50.** Receptor **10**,  $^1\text{H}$  NMR titration by  $\text{TBA}^+\text{Br}^-$  in  $\text{DMSO-}d_6$ , NH.

| c 10,<br>[mol/L] | c anion<br>[mol/L] | $\Delta\delta$ NH<br>[Hz] |
|------------------|--------------------|---------------------------|
| 0.0044           | 0                  | 0                         |
| 0.0044           | 0.0004             | 2.3                       |
| 0.0044           | 0.0008             | 4.4                       |
| 0.0044           | 0.0012             | 5.7                       |
| 0.0044           | 0.0019             | 8.1                       |
| 0.0044           | 0.0026             | 10.4                      |
| 0.0044           | 0.0036             | 13.5                      |
| 0.0044           | 0.0049             | 16.8                      |
| 0.0044           | 0.0061             | 19.8                      |
| 0.0044           | 0.0080             | 23.6                      |
| 0.0044           | 0.0095             | 26.2                      |
| 0.0044           | 0.02               | 35                        |
| 0.0044           | 0.045              | 41.1                      |

<http://app.supramolecular.org/bindfit/view/42f209d2-ea26-4cd7-b833-b6cbf6c34c6a>

**Figure S51.** Receptor **10**,  $^1\text{H}$  NMR titration by  $\text{TBA}^+\text{HSO}_4^-$  in  $\text{DMSO}-d_6$ , ArH.

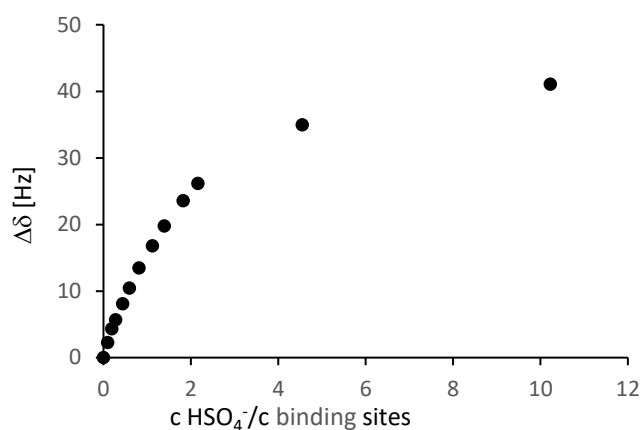

| c 11,<br>[mol/L] | c anion<br>[mol/L] | $\Delta\delta$ NH<br>[Hz] |
|------------------|--------------------|---------------------------|
| 0.0029           | 0                  | 0                         |
| 0.0029           | 0.0004             | -34.4                     |
| 0.0029           | 0.0008             | 36.1                      |
| 0.0029           | 0.0012             | 66.8                      |
| 0.0029           | 0.0019             | 156.3                     |
| 0.0029           | 0.0025             | 245.8                     |
| 0.0029           | 0.0034             | 352                       |
| 0.0029           | 0.0047             | 481                       |
| 0.0029           | 0.0058             | 542.7                     |
| 0.0029           | 0.0077             | 609.8                     |
| 0.0029           | 0.0091             | 630.5                     |

**Figure S52.** Receptor **11**,  $^1\text{H}$  NMR titration by  $\text{TBA}^+\text{H}_2\text{PO}_4^-$  in  $\text{DMSO}-d_6$ , NH.

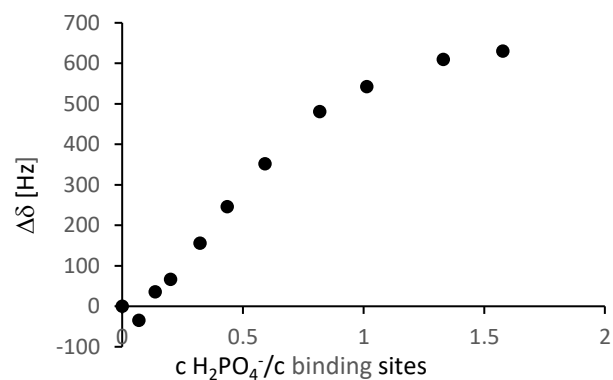

| c 12,<br>[mol/L] | c anion<br>[mol/L] | $\Delta\delta$ NH<br>[Hz] |
|------------------|--------------------|---------------------------|
| 0.0025           | 0                  | 0                         |
| 0.0025           | 0.0004             | -92                       |
| 0.0025           | 0.0008             | -104                      |
| 0.0025           | 0.0012             | -40                       |
| 0.0025           | 0.0019             | 88                        |
| 0.0025           | 0.0025             | 168                       |
| 0.0025           | 0.0034             | 252                       |
| 0.0025           | 0.0047             | 384                       |
| 0.0025           | 0.0058             | 496                       |
| 0.0025           | 0.0077             | 624                       |

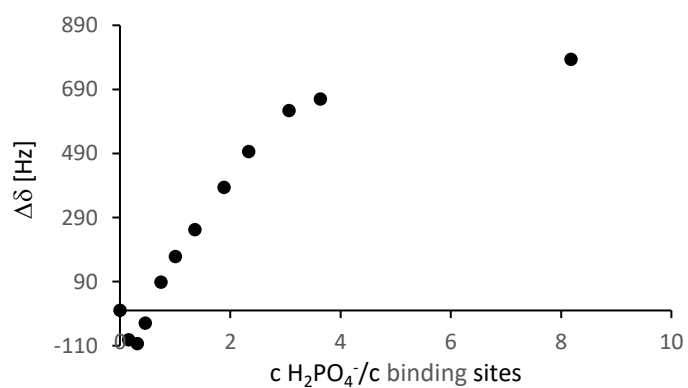

|        |        |     |
|--------|--------|-----|
| 0.0025 | 0.0091 | 660 |
| 0.0025 | 0.0204 | 784 |

**Figure S53.** Receptor **12**,  $^1\text{H}$  NMR titration by  $\text{TBA}^+\text{H}_2\text{PO}_4^-$  in  $\text{DMSO-}d_6$ ,  $\text{NH}$ .

| c 13,<br>[mol/L] | c anion<br>[mol/L] | $\Delta\delta$ ArH<br>[Hz] |
|------------------|--------------------|----------------------------|
| 0.0011           | 0                  | 0                          |
| 0.0011           | 0.0004             | 10.4                       |
| 0.0011           | 0.0009             | 24.9                       |
| 0.0011           | 0.0013             | 38.7                       |
| 0.0011           | 0.0021             | 51                         |
| 0.0011           | 0.0028             | 62.6                       |
| 0.0011           | 0.0039             | 69.3                       |
| 0.0011           | 0.0054             | 72.9                       |
| 0.0011           | 0.0067             | 76.2                       |
| 0.0011           | 0.0087             | 78.9                       |
| 0.0011           | 0.0104             | 80.5                       |
| 0.0011           | 0.0234             | 80.6                       |

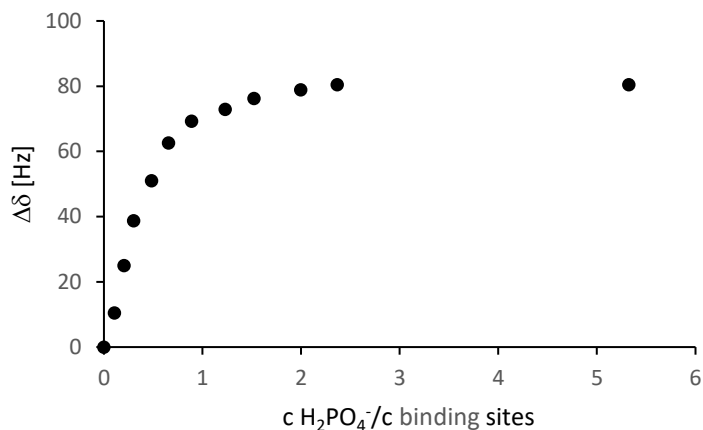

**Figure S54.** Receptor **13**,  $^1\text{H}$  NMR titration by  $\text{TBA}^+\text{H}_2\text{PO}_4^-$  in  $\text{DMSO-}d_6$ ,  $\text{ArH}$ .

| c 13,<br>[mol/L] | c anion<br>[mol/L] | $\Delta\delta$ NH<br>[Hz] |
|------------------|--------------------|---------------------------|
| 0.0011           | 0                  | 0                         |
| 0.0011           | 0.0004             | 14.3                      |
| 0.0011           | 0.0008             | 28.9                      |
| 0.0011           | 0.0012             | 41.0                      |
| 0.0011           | 0.0019             | 63.0                      |
| 0.0011           | 0.0026             | 82.8                      |
| 0.0011           | 0.0035             | 104.1                     |
| 0.0011           | 0.0049             | 135.2                     |
| 0.0011           | 0.0061             | 156.5                     |
| 0.0011           | 0.0079             | 186.2                     |
| 0.0011           | 0.0094             | 208.2                     |
| 0.0011           | 0.0212             | 375.8                     |
| 0.0011           | 0.0420             | 440                       |

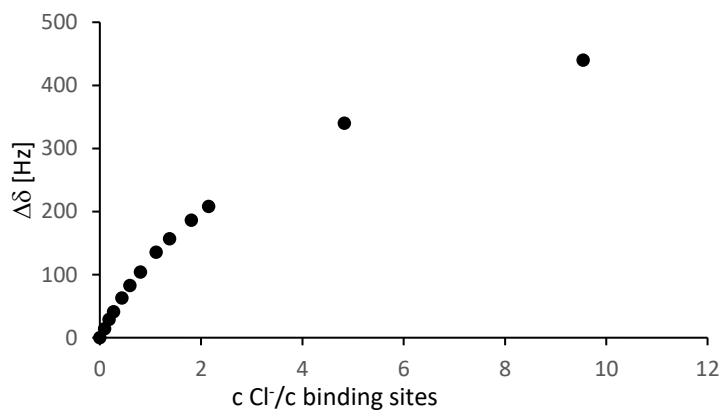

**Figure S55.** Receptor **13**,  $^1\text{H}$  NMR titration by  $\text{TBA}^+\text{Cl}^-$  in  $\text{DMSO-}d_6$ ,  $\text{NH}$ .

| c 14,<br>[mol/L] | c anion<br>[mol/L] | $\Delta\delta$ ArH<br>[Hz] |
|------------------|--------------------|----------------------------|
| 0.0005           | 0                  | 0                          |
| 0.0005           | 0.0004             | 16.6                       |
| 0.0005           | 0.0008             | 36.4                       |
| 0.0005           | 0.0012             | 50.2                       |
| 0.0005           | 0.0019             | 55.9                       |
| 0.0005           | 0.0026             | 65.8                       |
| 0.0005           | 0.0035             | 70.6                       |
| 0.0005           | 0.0049             | 71.6                       |
| 0.0005           | 0.0061             | 74.5                       |
| 0.0005           | 0.0080             | 76.7                       |
| 0.0005           | 0.0095             | 77.7                       |
| 0.0005           | 0.0218             | 81.9                       |

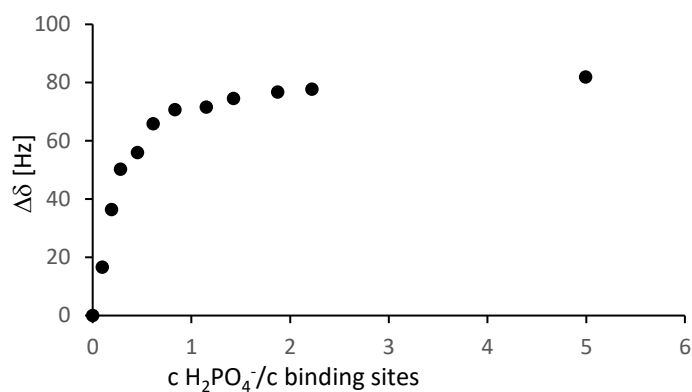

**Figure S56.** Receptor **14**,  $^1\text{H}$  NMR titration by  $\text{TBA}^+\text{H}_2\text{PO}_4^-$  in  $\text{DMSO-}d_6$ , ArH.

| c 14,<br>[mol/L] | c anion<br>[mol/L] | $\Delta\delta$ NH<br>[Hz] |
|------------------|--------------------|---------------------------|
| 0.0005           | 0                  | 0                         |
| 0.0005           | 0.0004             | 17.4                      |
| 0.0005           | 0.0009             | 31.8                      |
| 0.0005           | 0.0013             | 44.9                      |
| 0.0005           | 0.0020             | 62.8                      |
| 0.0005           | 0.0028             | 81                        |
| 0.0005           | 0.0037             | 104.3                     |
| 0.0005           | 0.0052             | 133.9                     |
| 0.0005           | 0.0064             | 154.9                     |
| 0.0005           | 0.0084             | 180.8                     |
| 0.0005           | 0.0100             | 201.7                     |
| 0.0005           | 0.0225             | 337.2                     |
| 0.0005           | 0.0420             | 430                       |

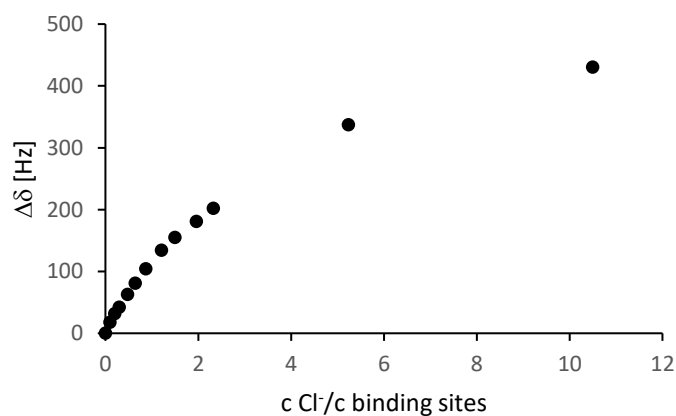

**Figure S57.** Receptor **14**,  $^1\text{H}$  NMR titration by  $\text{TBA}^+\text{Cl}^-$  in  $\text{DMSO-}d_6$ , NH.

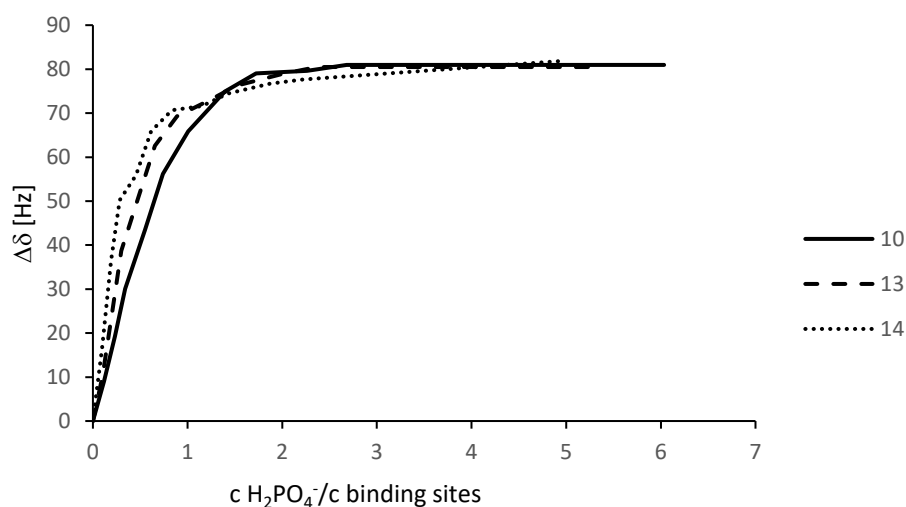

**Figure S58.**  $^1\text{H}$  NMR titration by  $\text{TBA}^+\text{H}_2\text{PO}_4^-$  in  $\text{DMSO-}d_6$ , comparison for receptor **10**, **13** and **14**,  $\text{ArH}$ . An overlay of Figures S46, S54 and S56.

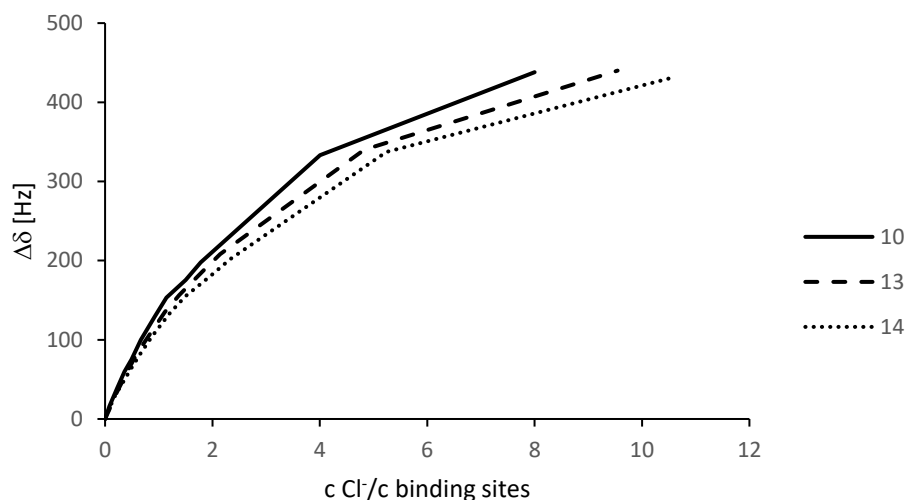

**Figure S59.**  $^1\text{H}$  NMR titration by  $\text{TBA}^+\text{Cl}^-$  in  $\text{DMSO-}d_6$ , comparison for receptor **10**, **13** and **14**,  $\text{ArH}$ . An overlay of Figures S49, S55 and S57.

| c <b>10</b> ,<br>[mol/L] | c anion<br>[mol/L] | $\Delta\delta$ $\text{ArH}$ -<br><b>10</b> [Hz] |
|--------------------------|--------------------|-------------------------------------------------|
| 0.004                    | 0                  | 0                                               |
| 0.004                    | 0.0004             | 6.8                                             |
| 0.004                    | 0.0009             | 16.4                                            |
| 0.004                    | 0.0013             | 27.8                                            |
| 0.004                    | 0.0020             | 43.2                                            |
| 0.004                    | 0.0028             | 57.1                                            |
| 0.004                    | 0.0037             | 70.7                                            |
| 0.004                    | 0.0052             | 84.0                                            |
| 0.004                    | 0.0064             | 87.4                                            |

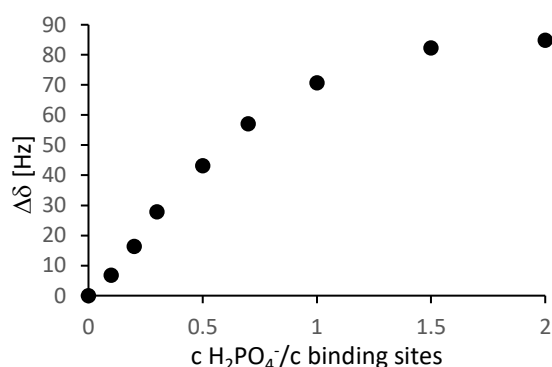

**Figure S60.** Receptor **10**,  $^1\text{H}$  NMR titration by  $\text{TBA}^+\text{H}_2\text{PO}_4^-$  in  $\text{DMSO-}d_6$ , signal of **10** corresponding to signal selected for competitive experiments with **13** and **14**,  $\text{ArH}$ .

| c <b>10</b> ,<br>[mol/L] | c <b>13</b> ,<br>[mol/L] | c anion<br>[mol/L] | $\Delta\delta$ $\text{ArH}$ -<br><b>10</b> [Hz] |
|--------------------------|--------------------------|--------------------|-------------------------------------------------|
| 0.004                    | 0.001                    | 0                  | 0                                               |
| 0.004                    | 0.001                    | 0.0008             | 4.7                                             |
| 0.004                    | 0.001                    | 0.0018             | 12.8                                            |
| 0.004                    | 0.001                    | 0.0026             | 26.2                                            |
| 0.004                    | 0.001                    | 0.0040             | 48.1                                            |
| 0.004                    | 0.001                    | 0.0056             | 68.0                                            |
| 0.004                    | 0.001                    | 0.0074             | 73.9                                            |
| 0.004                    | 0.001                    | 0.0104             | 83.1                                            |
| 0.004                    | 0.001                    | 0.0128             | 84.0                                            |

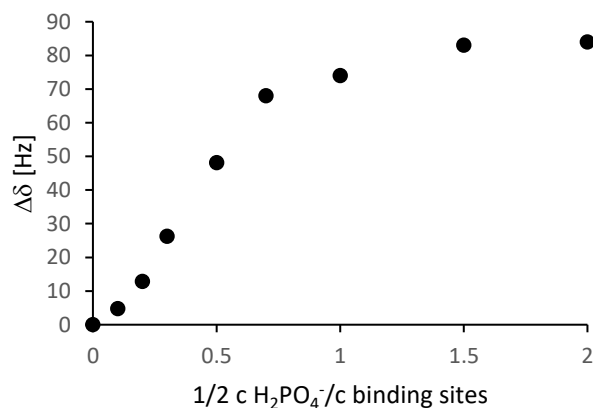

**Figure S61.** Mixture of receptor **10** and **13**, selected signal of **10**,  $^1\text{H}$  NMR titration by  $\text{TBA}^+\text{H}_2\text{PO}_4^-$  in  $\text{DMSO-}d_6$ ,  $\text{ArH}$ .

| c <b>10</b> ,<br>[mol/L] | c <b>14</b> ,<br>[mol/L] | c anion<br>[mol/L] | $\Delta\delta$ ArH -<br><b>10</b> [Hz] |
|--------------------------|--------------------------|--------------------|----------------------------------------|
| 0.004                    | 0.0005                   | 0                  | 0                                      |
| 0.004                    | 0.0005                   | 0.0008             | 5.6                                    |
| 0.004                    | 0.0005                   | 0.0018             | 12.9                                   |
| 0.004                    | 0.0005                   | 0.0026             | 17.5                                   |
| 0.004                    | 0.0005                   | 0.0040             | 28.4                                   |
| 0.004                    | 0.0005                   | 0.0056             | 39.6                                   |
| 0.004                    | 0.0005                   | 0.0074             | 68.9                                   |
| 0.004                    | 0.0005                   | 0.0104             | 81.0                                   |
| 0.004                    | 0.0005                   | 0.0128             | 83.9                                   |

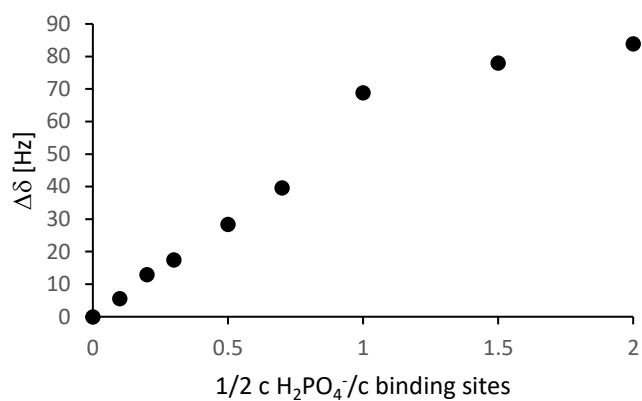

**Figure S62.** Mixture of receptor **10** and **13**, selected signal of **10**,  $^1\text{H}$  NMR titration by  $\text{TBA}^+\text{H}_2\text{PO}_4^-$  in  $\text{DMSO}-d_6$ , ArH.

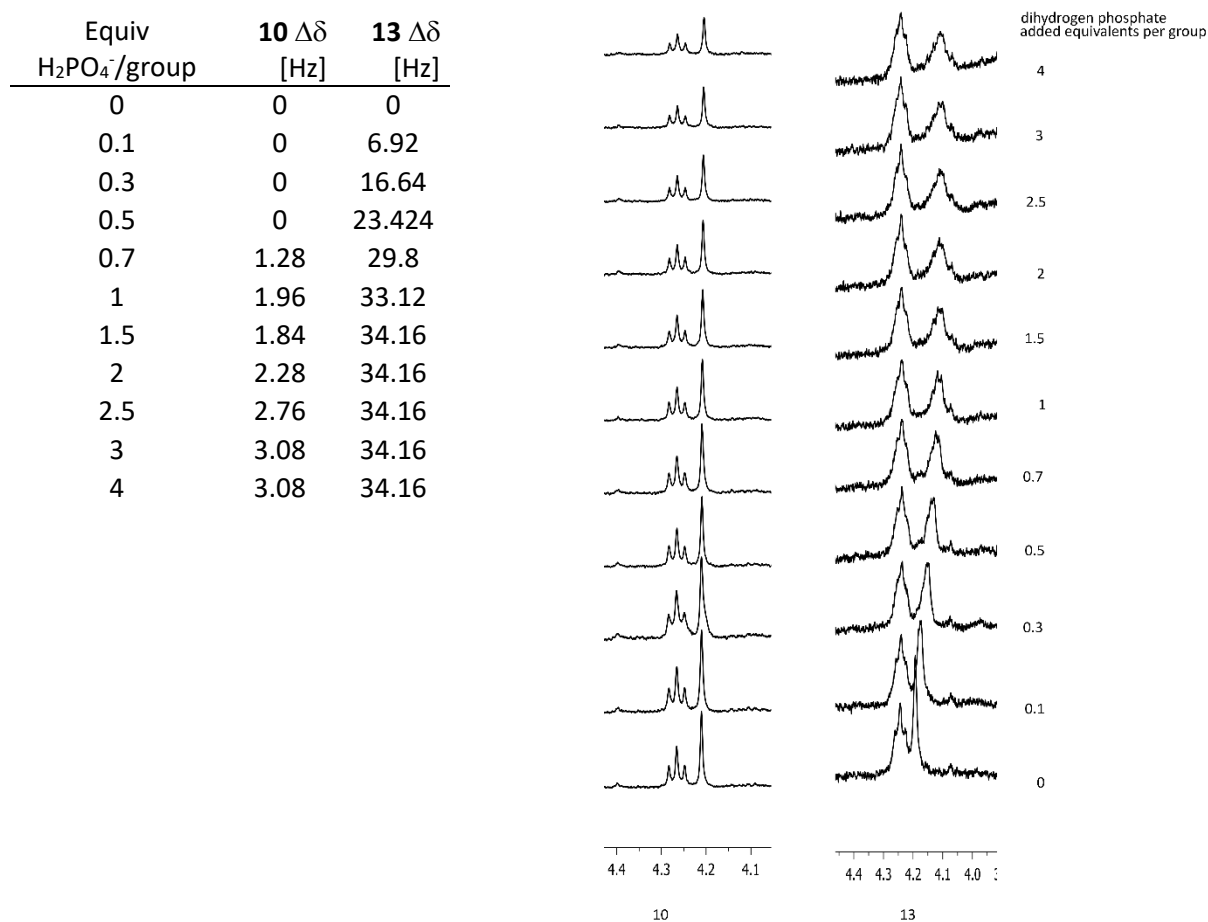

**Figure S63.** Receptor **10** and **13**, <sup>1</sup>H NMR titration by TBA<sup>+</sup>H<sub>2</sub>PO<sub>4</sub><sup>-</sup> in DMSO-*d*<sub>6</sub>, complexation induced changes of triazole proton.

## X-Ray single crystal diffraction analysis

Crystal data: C<sub>17</sub>H<sub>17</sub>N<sub>3</sub>O<sub>3</sub>S · C<sub>2</sub>H<sub>6</sub>OS, *M* = 421.54 g.mol<sup>-1</sup>, triclinic system, space group *P*-1, *a* = 8.4301 (3) Å, *b* = 11.0724 (4) Å, *c* = 12.3965 (4) Å, α = 102.0283 (8)°, β = 97.5228 (8)°, γ = 111.6707 (7)°, *Z* = 2, *V* = 1023.84 (6) Å<sup>3</sup>, *D*<sub>c</sub> = 1.367 g.cm<sup>-3</sup>, μ(Cu-Kα) = 2.62 mm<sup>-1</sup>, crystal dimensions of 0.69 × 0.60 × 0.30 mm, *T* = 293 (2) K, *R* = 0.030, *wR* = 0.0832, using 4023 independent reflections (*θ*<sub>max</sub> = 72.2°), 262 parameters and 8 restraints, CCDC code 2092890.



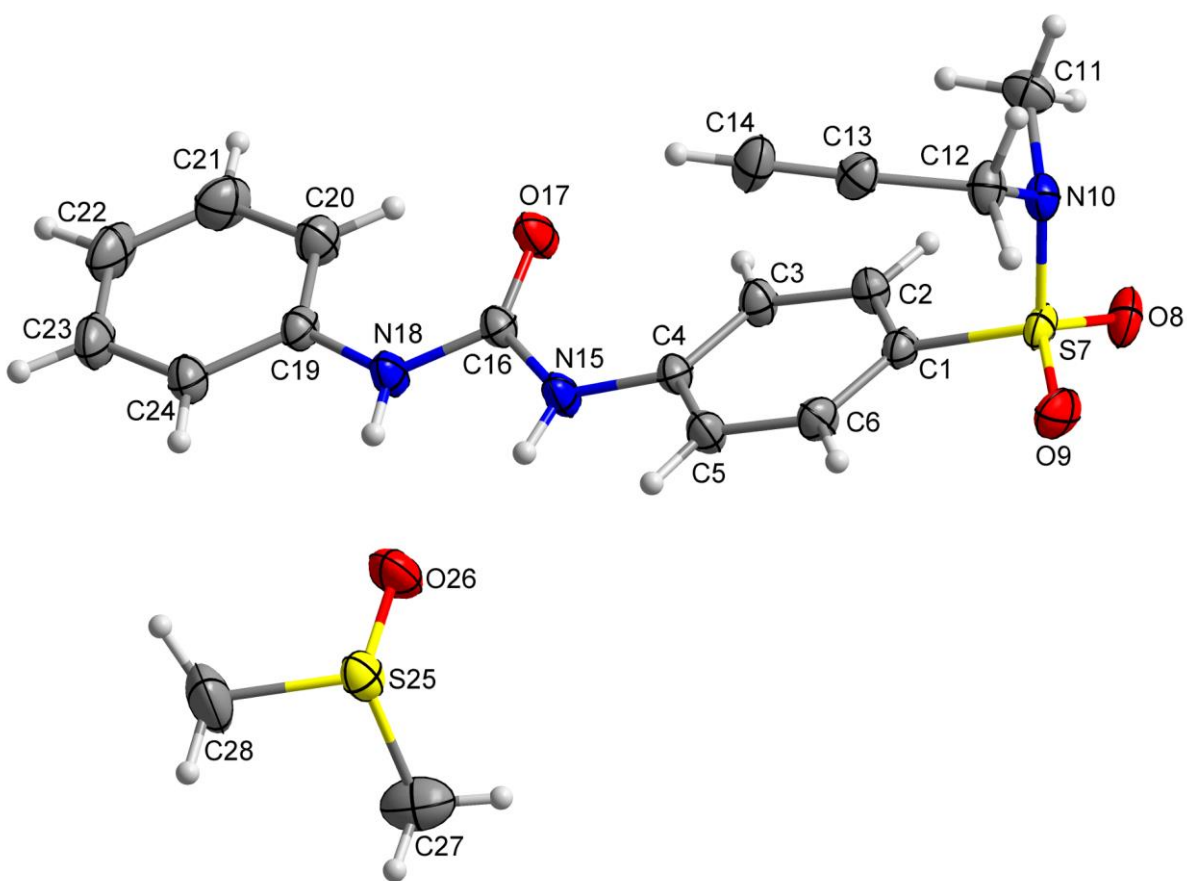

**Figure S64.** The numbering scheme of structure **4**, with ADPs drawn at 50% probability level
